# Supplementary material for: Effects on the transcriptome upon deletion of a distal element cannot be predicted by the size of the H3K27Ac peak in human cells
Source: PubMed Central journal article supplement — Nucleic Acids Res. 2016 Jan 6;44(9):4123–33. doi: 10.1093/nar/gkv1530 (PMC4872074; doi:10.1093/nar/gkv1530), 2016-01-06
Supplement: supp_gkv1530_nar-03272-v-2015-File010.pdf [file supp_gkv1530_nar-03272-v-2015-File010.pdf]

**Additional File 1. Guide RNA sequences.**

| Distal region | Size of deleted region (Kb) | Chromosome | Start     | End       | Location     | guide RNA1           | guide RNA2           |
|---------------|-----------------------------|------------|-----------|-----------|--------------|----------------------|----------------------|
| E7 (HCT116)   | 2.6                         | chr8       | 128412627 | 128415224 | CASC8 intron | TGGAGGCCCTAGCAATTCCG | GGCCATTACAAC TGGCCTG |
| E7 (HEK 293T) | 2.0                         | chr8       | 128412821 | 128414838 | CASC8 intron | CTCTGTTGATACCTCCCTCT | ATGTTCTAGCTAAGACTTTG |
| 18qE          | 2.4                         | Chr18      | 52442686  | 52445081  | Intergenic   | AATGACCGGTTTGTAGCCTG | CTTCTTCGGACATAATAGAG |
| 18qNE         | 1.1                         | Chr18      | 46002163  | 46003231  | Intergenic   | ACCTAGCCTCAGGTCGTGGT | CTCTCTATACATCCGTAGAG |
