# Supplementary material for: Effects on the transcriptome upon deletion of a distal element cannot be predicted by the size of the H3K27Ac peak in human cells
Source: PubMed Central journal article supplement — Nucleic Acids Res. 2016 Jan 6;44(9):4123–33. doi: 10.1093/nar/gkv1530 (PMC4872074; doi:10.1093/nar/gkv1530), 2016-01-06
Supplement: supp_gkv1530_nar-03272-v-2015-File012.pdf [file supp_gkv1530_nar-03272-v-2015-File012.pdf]

Tak. Additional File 3

1. Study design of RNA-seq

| A.             | Date of sequencing | Sequencer  | Cell line | Sample type | Clone #    | Replicate name (given by RNA extraction date) | Sample name | USC ID     | # of mapped reads |
|----------------|--------------------|------------|-----------|-------------|------------|-----------------------------------------------|-------------|------------|-------------------|
|                | 7/2/15             | Nextseq500 | HCT116    | Control     | 1          | A                                             | C1_A        | USC_RNA_56 | 16,835,185        |
|                |                    |            |           |             |            | B                                             | C1_B        | USC_RNA_57 | 16,136,616        |
|                |                    |            |           |             |            | C                                             | C1_C        | USC_RNA_58 | 12,973,689        |
|                |                    |            |           |             | 2          | A                                             | C2_A        | USC_RNA_59 | 17,849,912        |
|                |                    |            |           |             |            | B                                             | C2_B        | USC_RNA_60 | 16,536,346        |
|                |                    |            |           |             |            | C                                             | C2_C        | USC_RNA_61 | 16,479,259        |
|                |                    |            |           |             | 3          | A                                             | C3_A        | USC_RNA_62 | 16,880,730        |
|                |                    |            |           |             |            | B                                             | C3_B        | USC_RNA_63 | 14,510,306        |
|                |                    |            |           |             |            | C                                             | C3_C        | USC_RNA_64 | 12,879,816        |
|                |                    |            |           | 4           | A          | C4_A                                          | USC_RNA_65  | 13,674,375 |                   |
|                |                    |            |           |             | B          | C4_B                                          | USC_RNA_66  | 14,736,300 |                   |
|                |                    |            |           |             | C          | C4_C                                          | USC_RNA_67  | 15,768,373 |                   |
|                |                    |            |           | E7 Deletion | 1          | A                                             | E7_A        | USC_RNA_76 | 18,330,669        |
|                |                    |            |           |             |            | B                                             | E7_B        | USC_RNA_77 | 17,464,123        |
|                |                    |            |           |             |            | C                                             | E7_C        | USC_RNA_78 | 13,928,003        |
| 18qNE Deletion | 1                  | A          | NE1_A     | USC_RNA_68  | 14,051,545 |                                               |             |            |                   |
|                |                    | 2          | B         | NE2_B       | USC_RNA_70 | 17,159,364                                    |             |            |                   |
|                |                    | 3          | A         | NE3_A       | USC_RNA_72 | 16,559,866                                    |             |            |                   |

| B. | Date of sequencing | Sequencer  | Cell line | Sample type   | Clone # | Replicate name (given by RNA extraction date) | Sample name | USC ID     | # of mapped reads |
|----|--------------------|------------|-----------|---------------|---------|-----------------------------------------------|-------------|------------|-------------------|
|    | 5/5/15             | Nextseq500 | HCT116    | Control       | 1       | C                                             | C1          | USC_RNA_48 | 24,680,074        |
|    |                    |            |           |               | 2       |                                               | C2          | USC_RNA_49 | 22,926,469        |
|    |                    |            |           | 18qE Deletion | 1       |                                               | 18qE_1      | USC_RNA_52 | 24,837,265        |
|    |                    |            |           |               | 2       |                                               | 18qE_2      | USC_RNA_53 | 23,033,168        |

| C. | Date of sequencing | Sequencer  | Cell line | Sample type | Clone # | Replicate name (given by RNA extraction date) | Sample name  | USC ID     | # of mapped reads |
|----|--------------------|------------|-----------|-------------|---------|-----------------------------------------------|--------------|------------|-------------------|
|    | 1/27/15            | Nextseq500 | HEK 293   | Control     | 1       | D                                             | HEK_293_C1   | USC_RNA_40 | 28,851,361        |
|    |                    |            |           |             | 2       |                                               | HEK_293_C2   | USC_RNA_41 | 26,748,220        |
|    |                    |            |           | E7 Deletion | 1       |                                               | HEK_293_E7_1 | USC_RNA_42 | 35,279,209        |
|    |                    |            |           |             | 2       |                                               | HEK_293_E7_2 | USC_RNA_43 | 31,865,398        |

2. Study design of ChIP-seq

| Date of sequencing | Sequencer | Cell line | Antibody used | Sample type | Biological replicate | Sample name       | USC ID | # of mapped reads |
|--------------------|-----------|-----------|---------------|-------------|----------------------|-------------------|--------|-------------------|
| 9/9/14             | Hiseq2000 | HCT116    | H3K27Ac       | Control     | 1                    | H3K27Ac_Control_1 | USC646 | 29,859,232        |
| 12/5/14            |           |           |               |             | 2                    | H3K27Ac_Control_2 | USC659 | 27,282,365        |
| 9/9/14             |           |           |               | E7 Deletion | 1                    | H3K27Ac_E7Del_1   | USC652 | 26,250,803        |
| 12/5/14            |           |           |               |             | 2                    | H3K27Ac_E7Del_2   | USC660 | 31,175,944        |
