# Supplementary material for: Effects on the transcriptome upon deletion of a distal element cannot be predicted by the size of the H3K27Ac peak in human cells
Source: PubMed Central journal article supplement — Nucleic Acids Res. 2016 Jan 6;44(9):4123–33. doi: 10.1093/nar/gkv1530 (PMC4872074; doi:10.1093/nar/gkv1530), 2016-01-06

**A****1**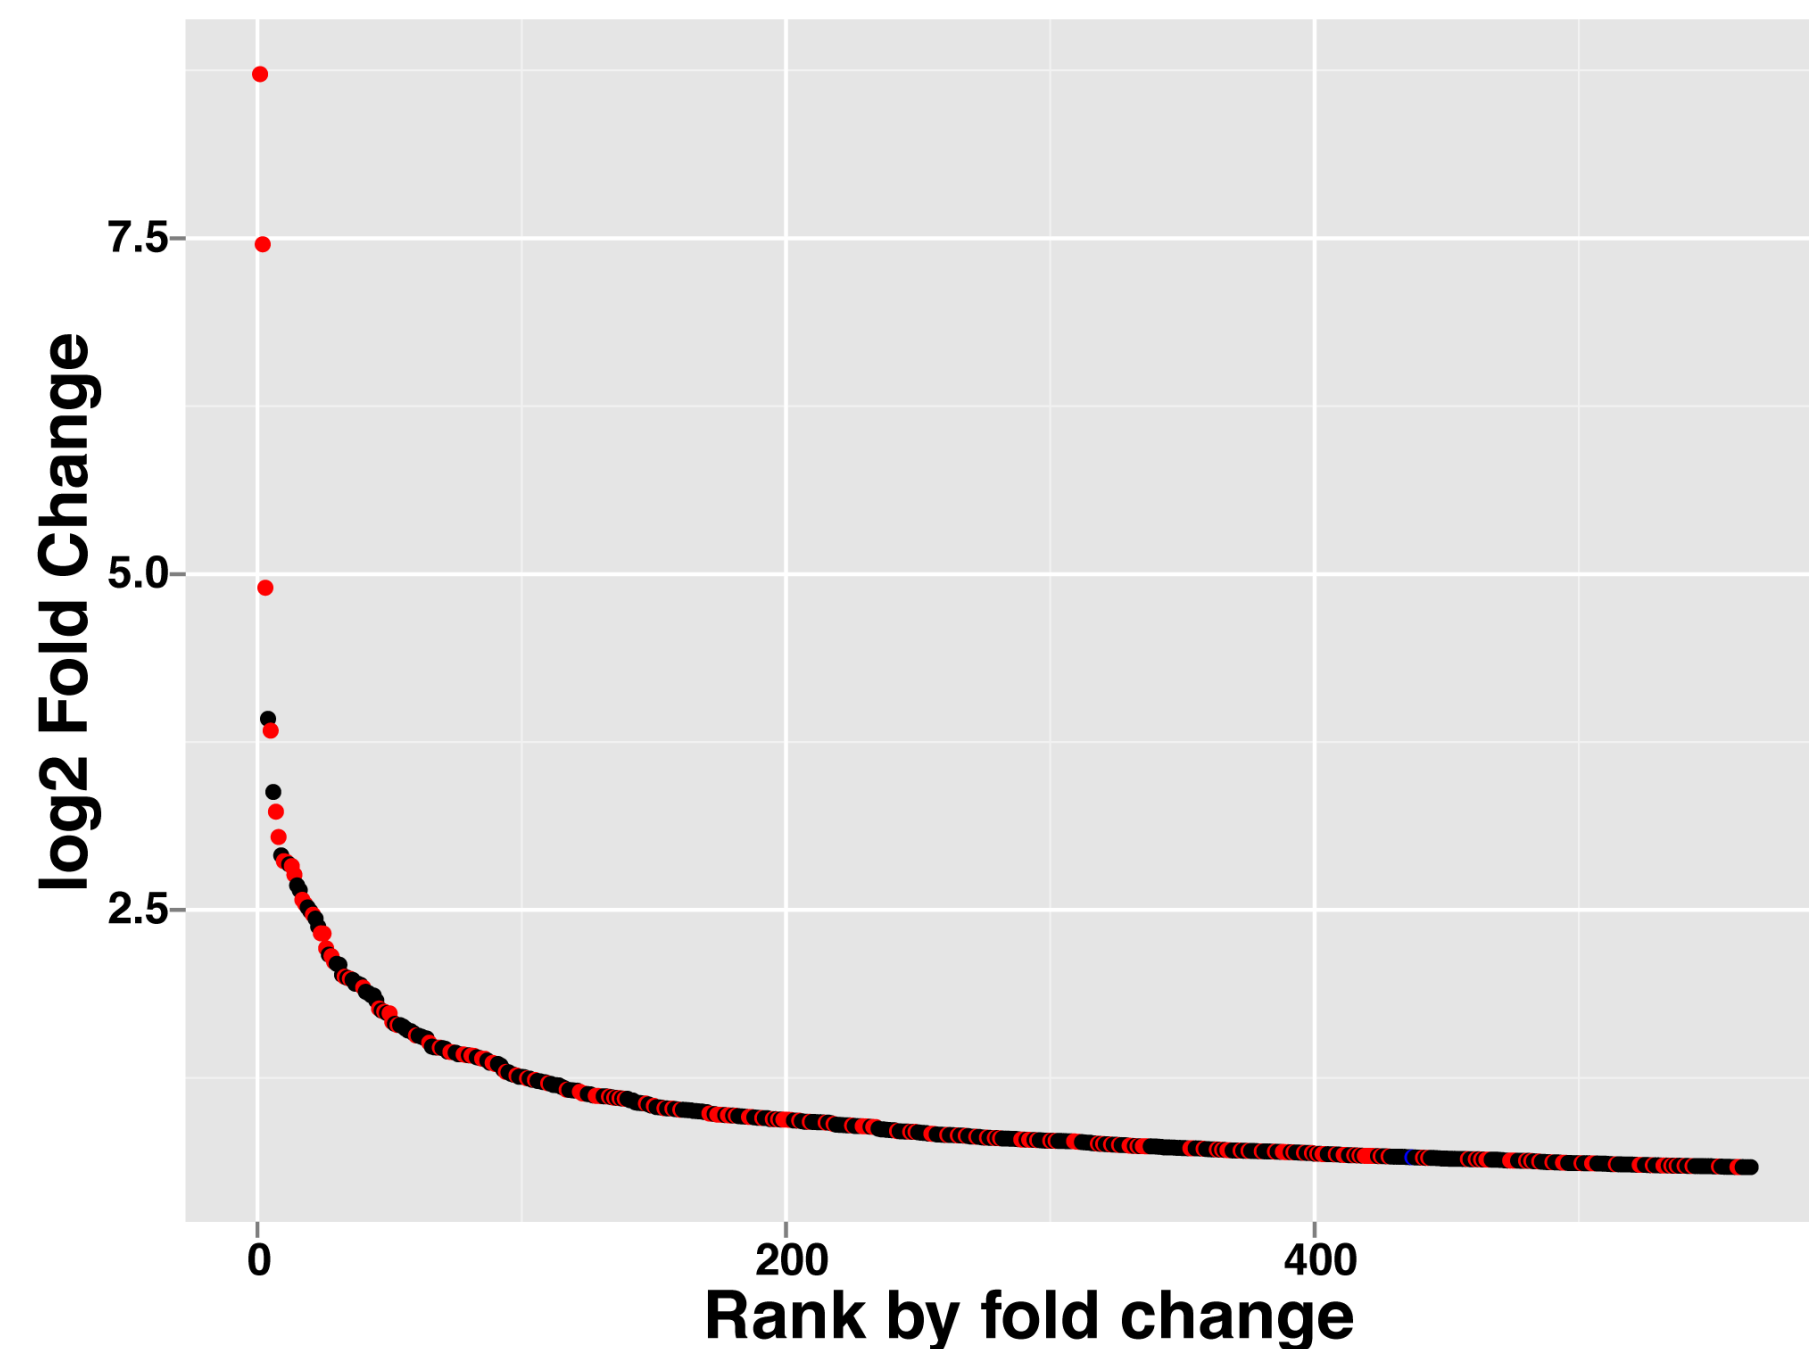

- Downregulated genes with decreased peaks (+/- 100Kb)
- Downregulated genes with increased peaks (+/- 100Kb)

**2**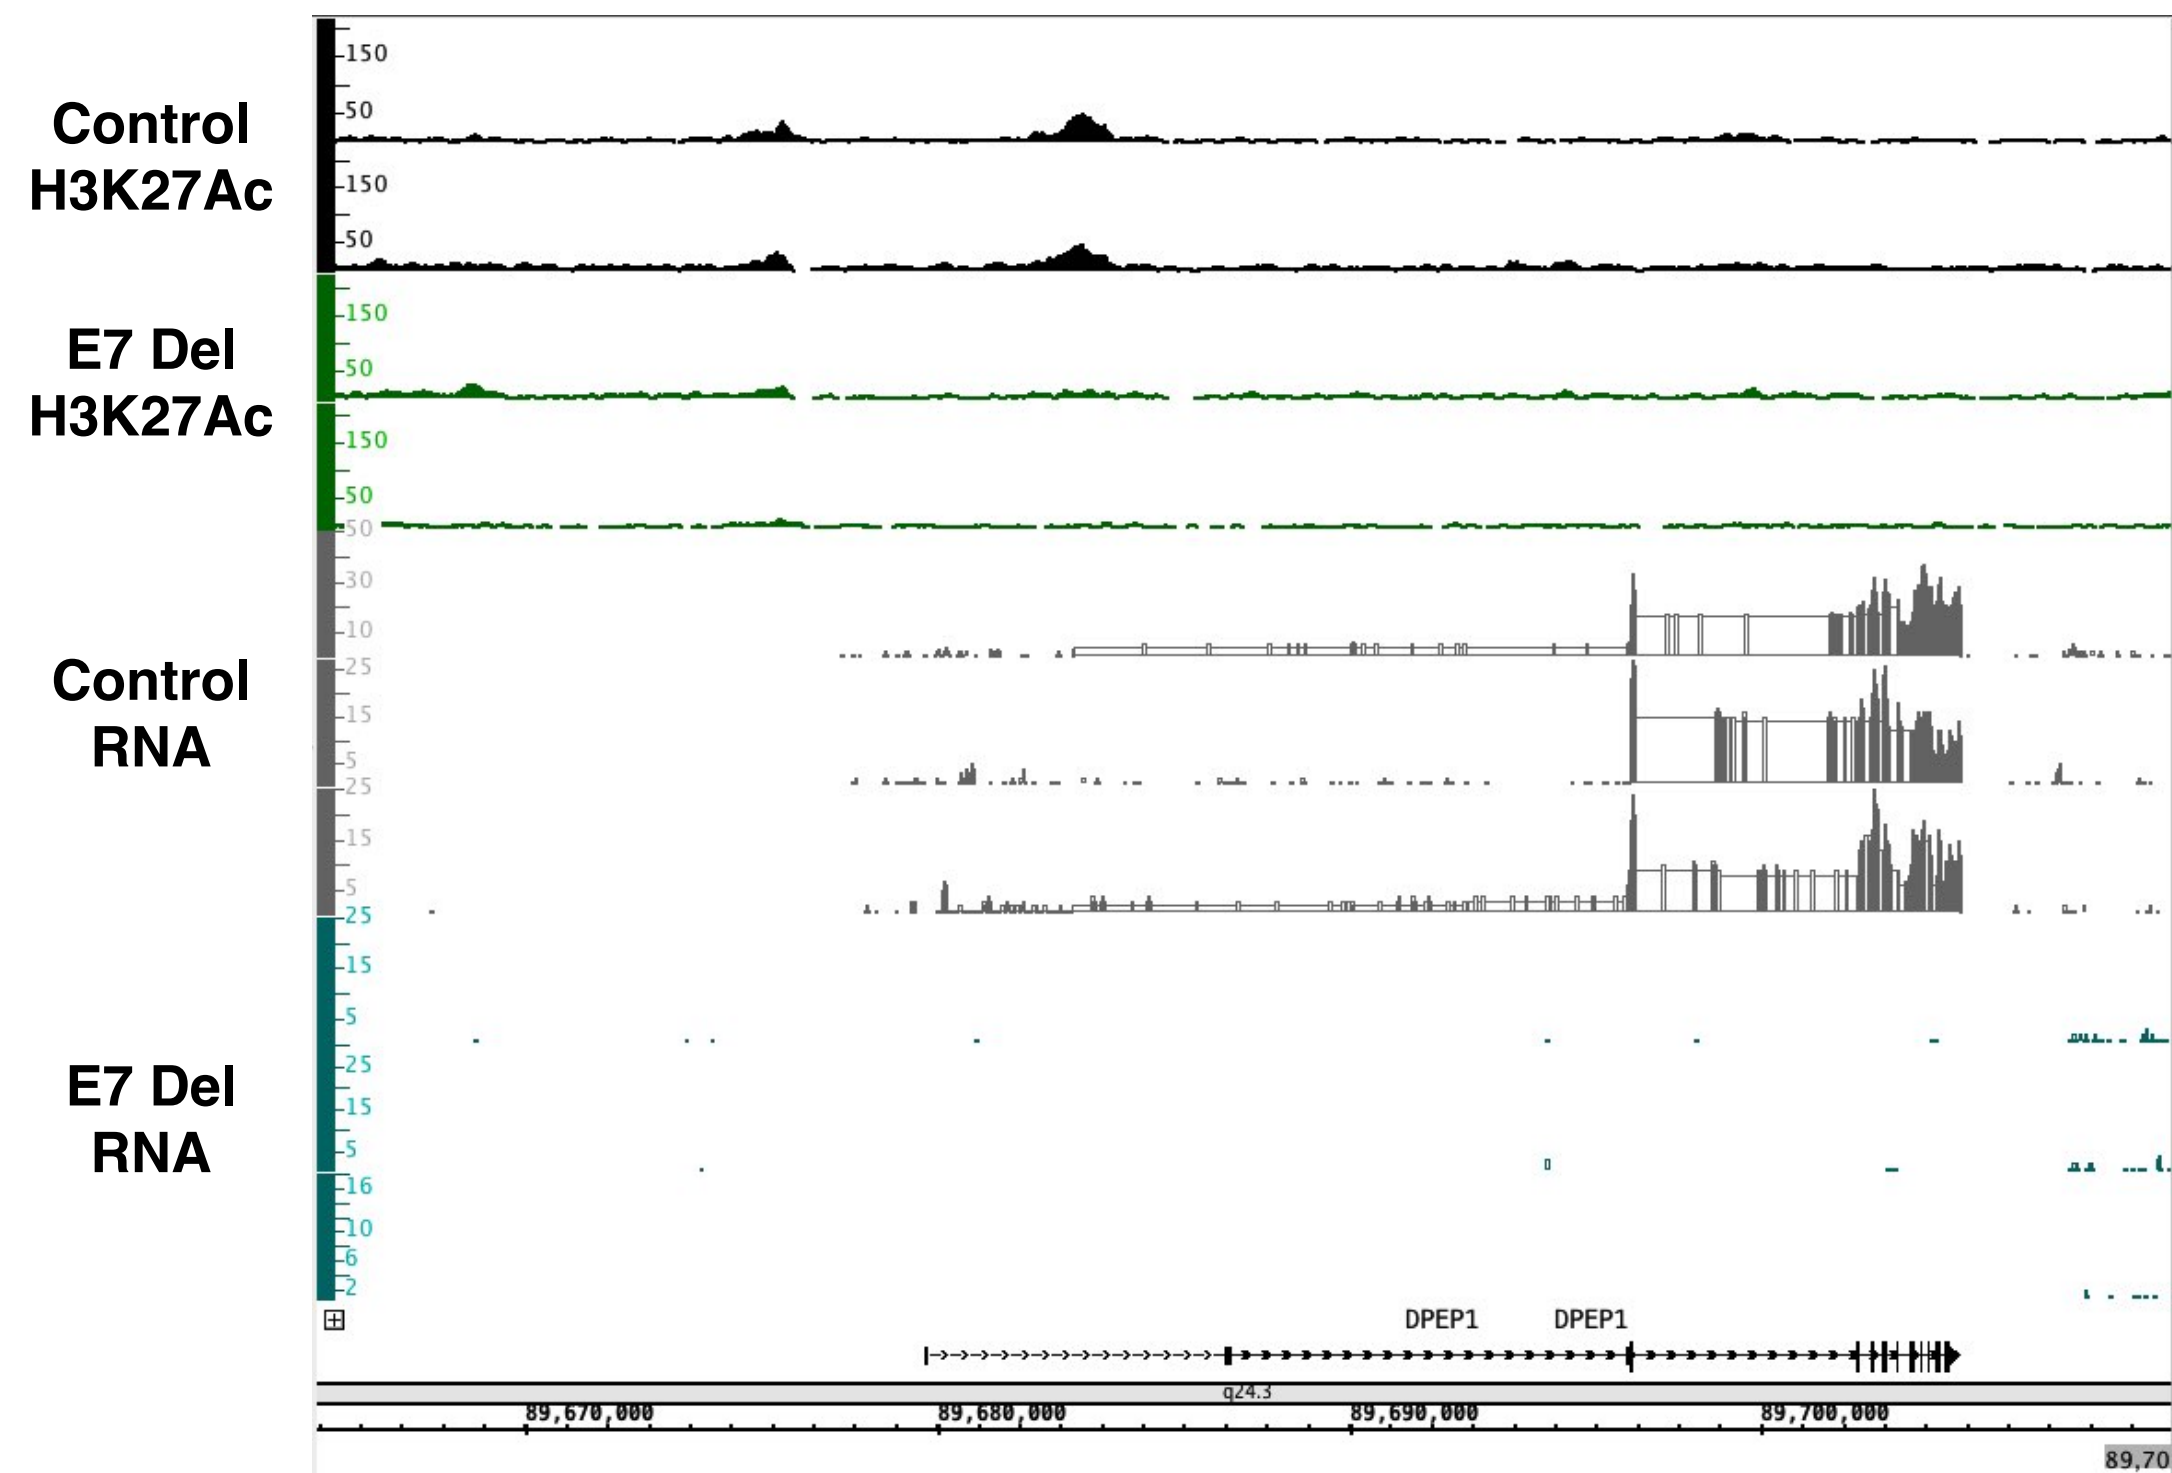**3**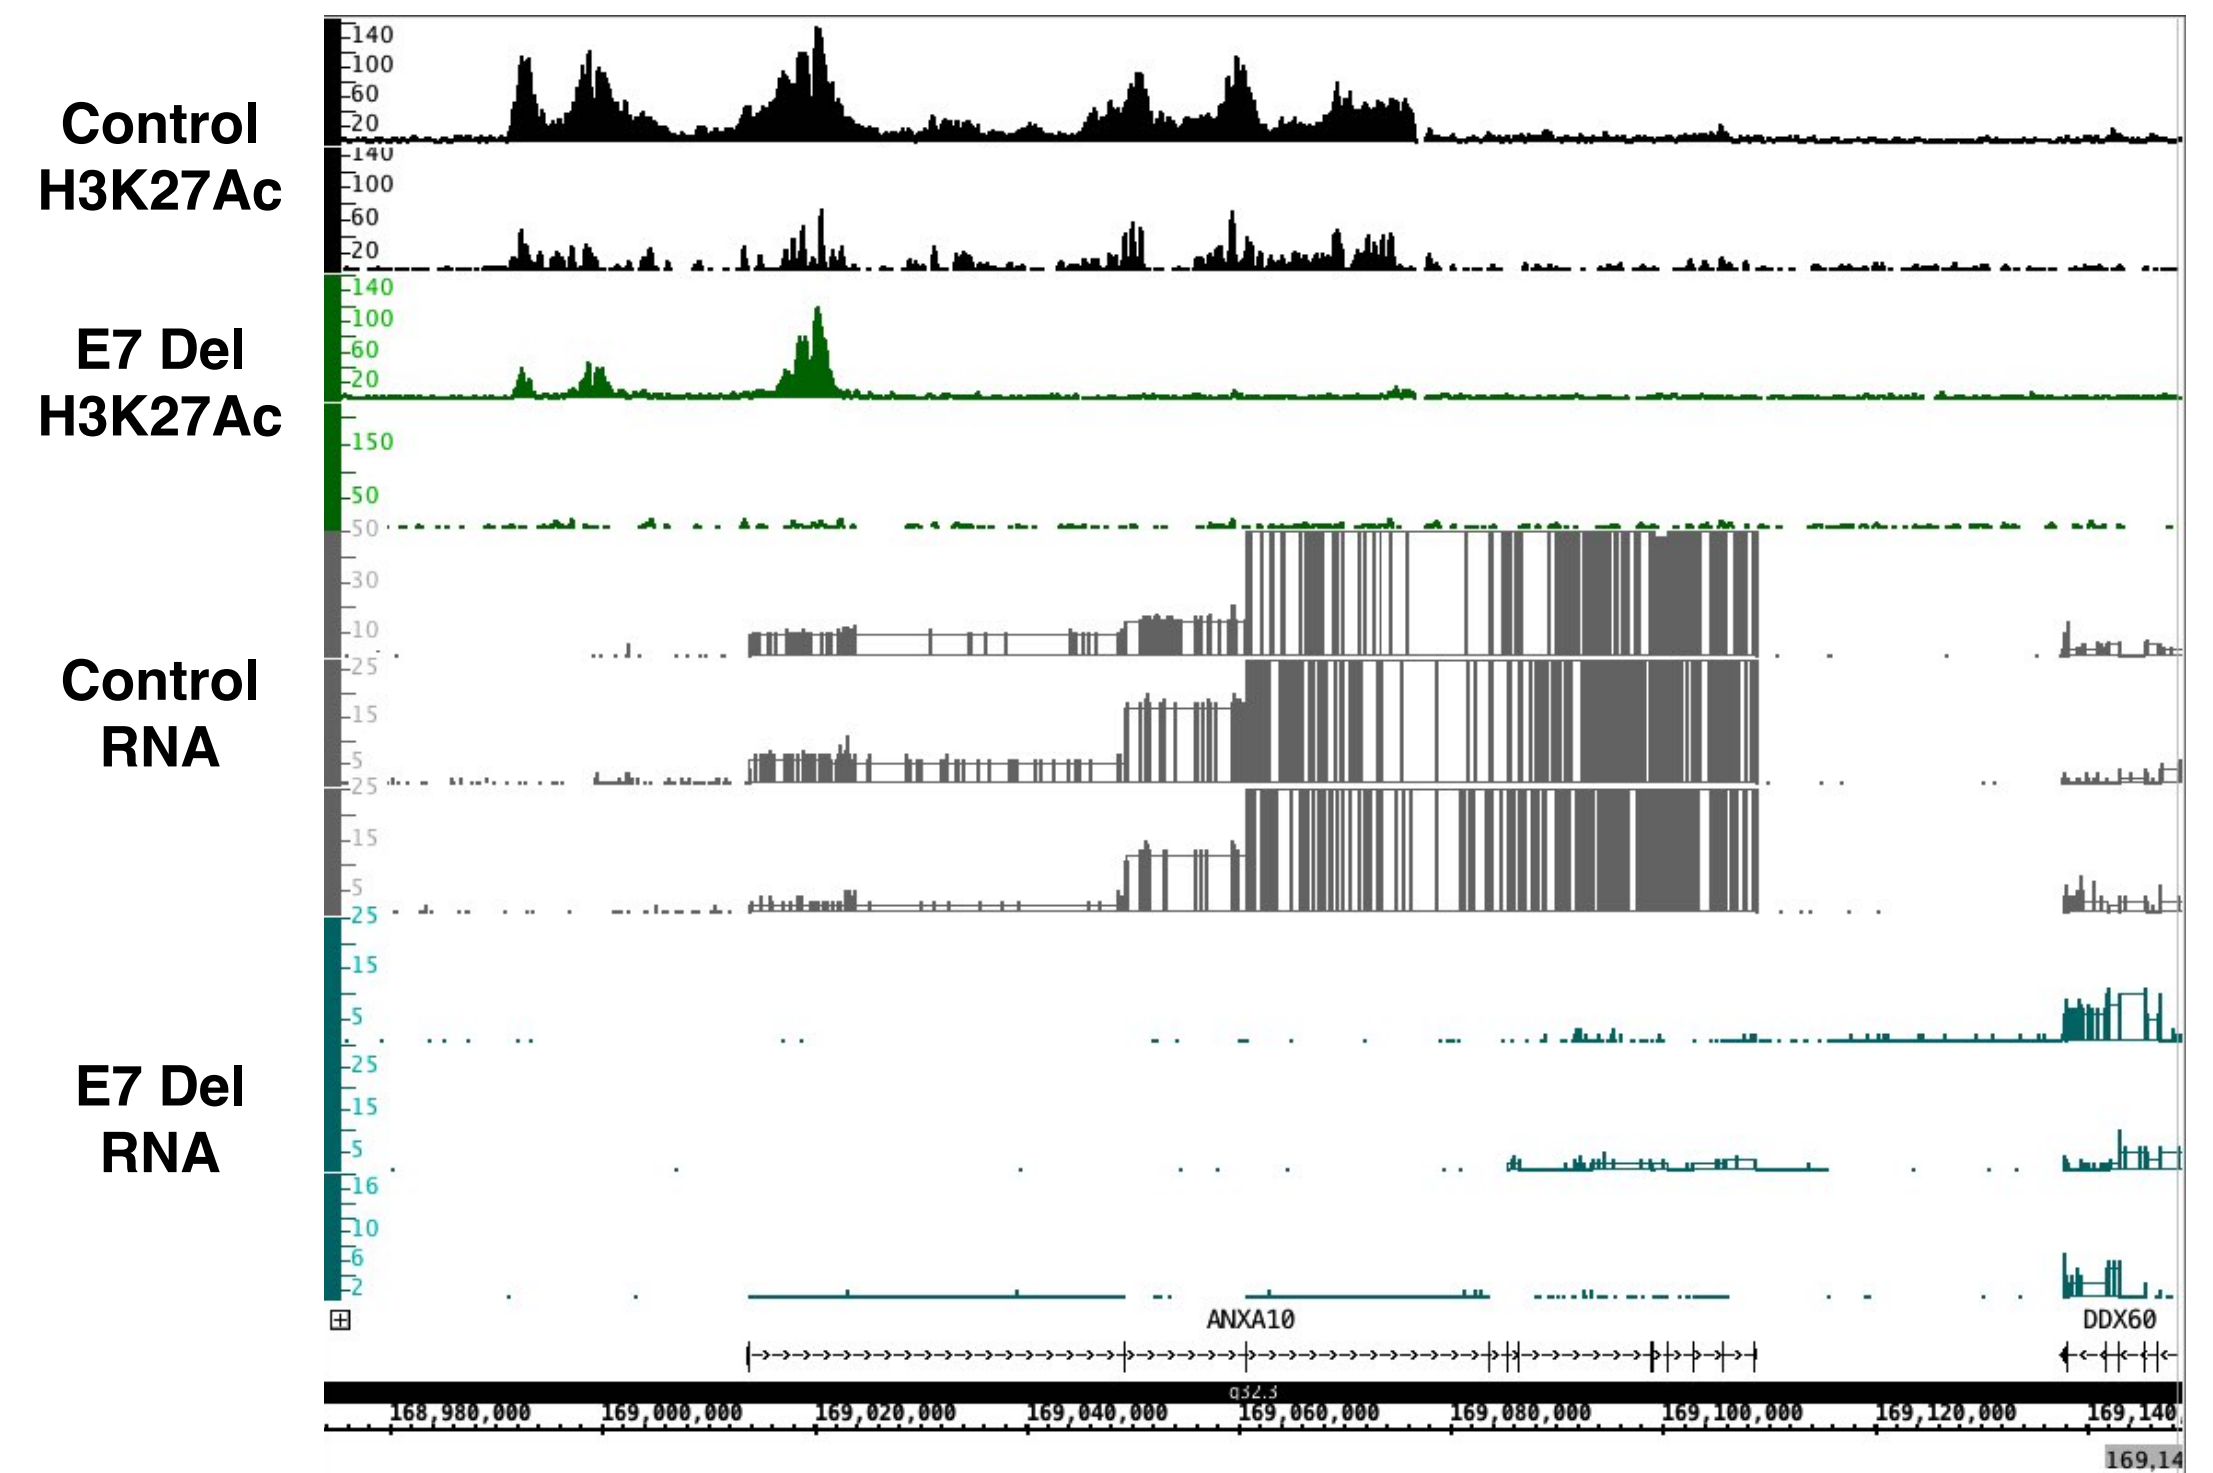

**B****1**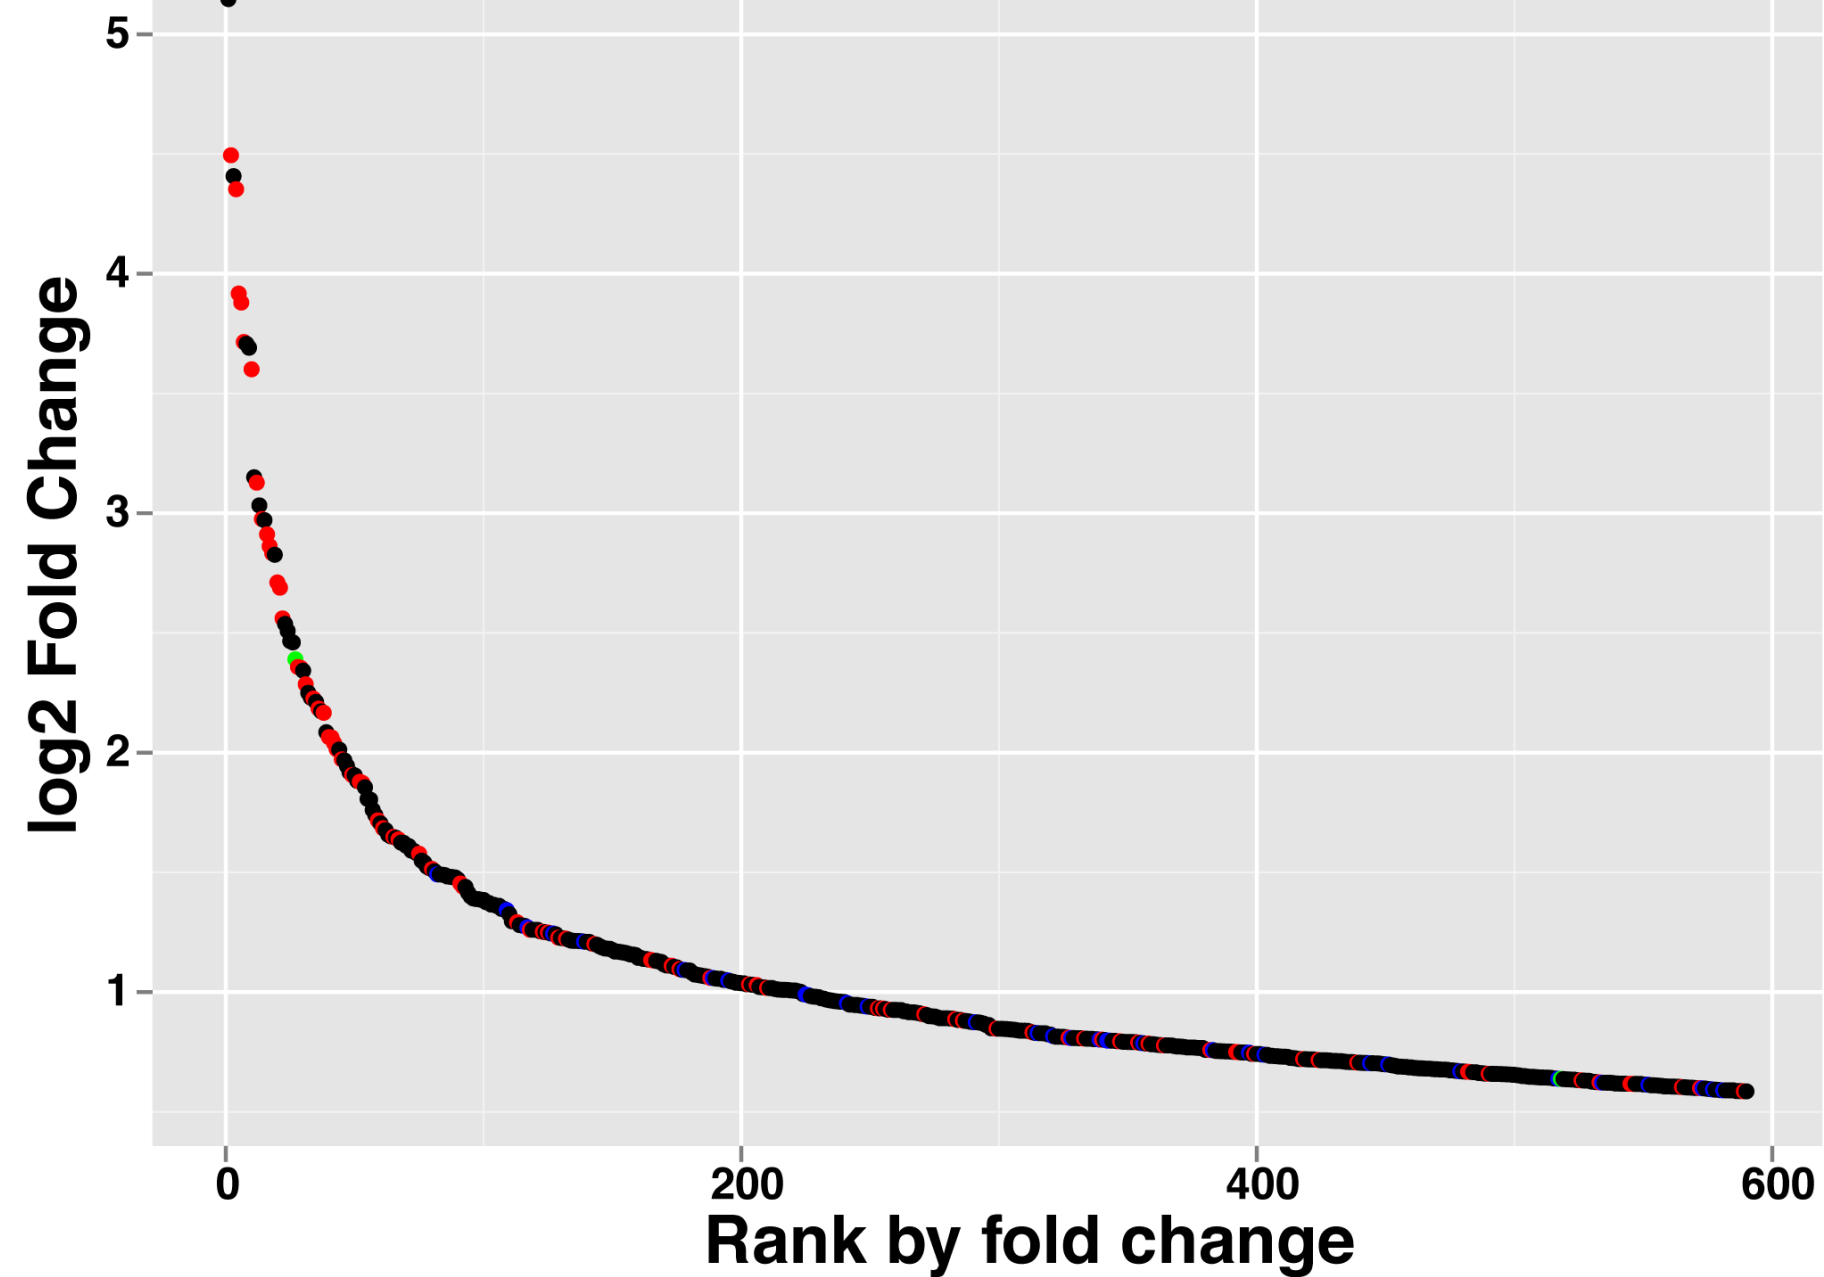

- Upregulated genes with increased peaks (+/- 100Kb)
- Upregulated genes with decreased peaks (+/- 100Kb)
- Upregulated genes with increased and decreased peaks (+/- 100Kb)

**2**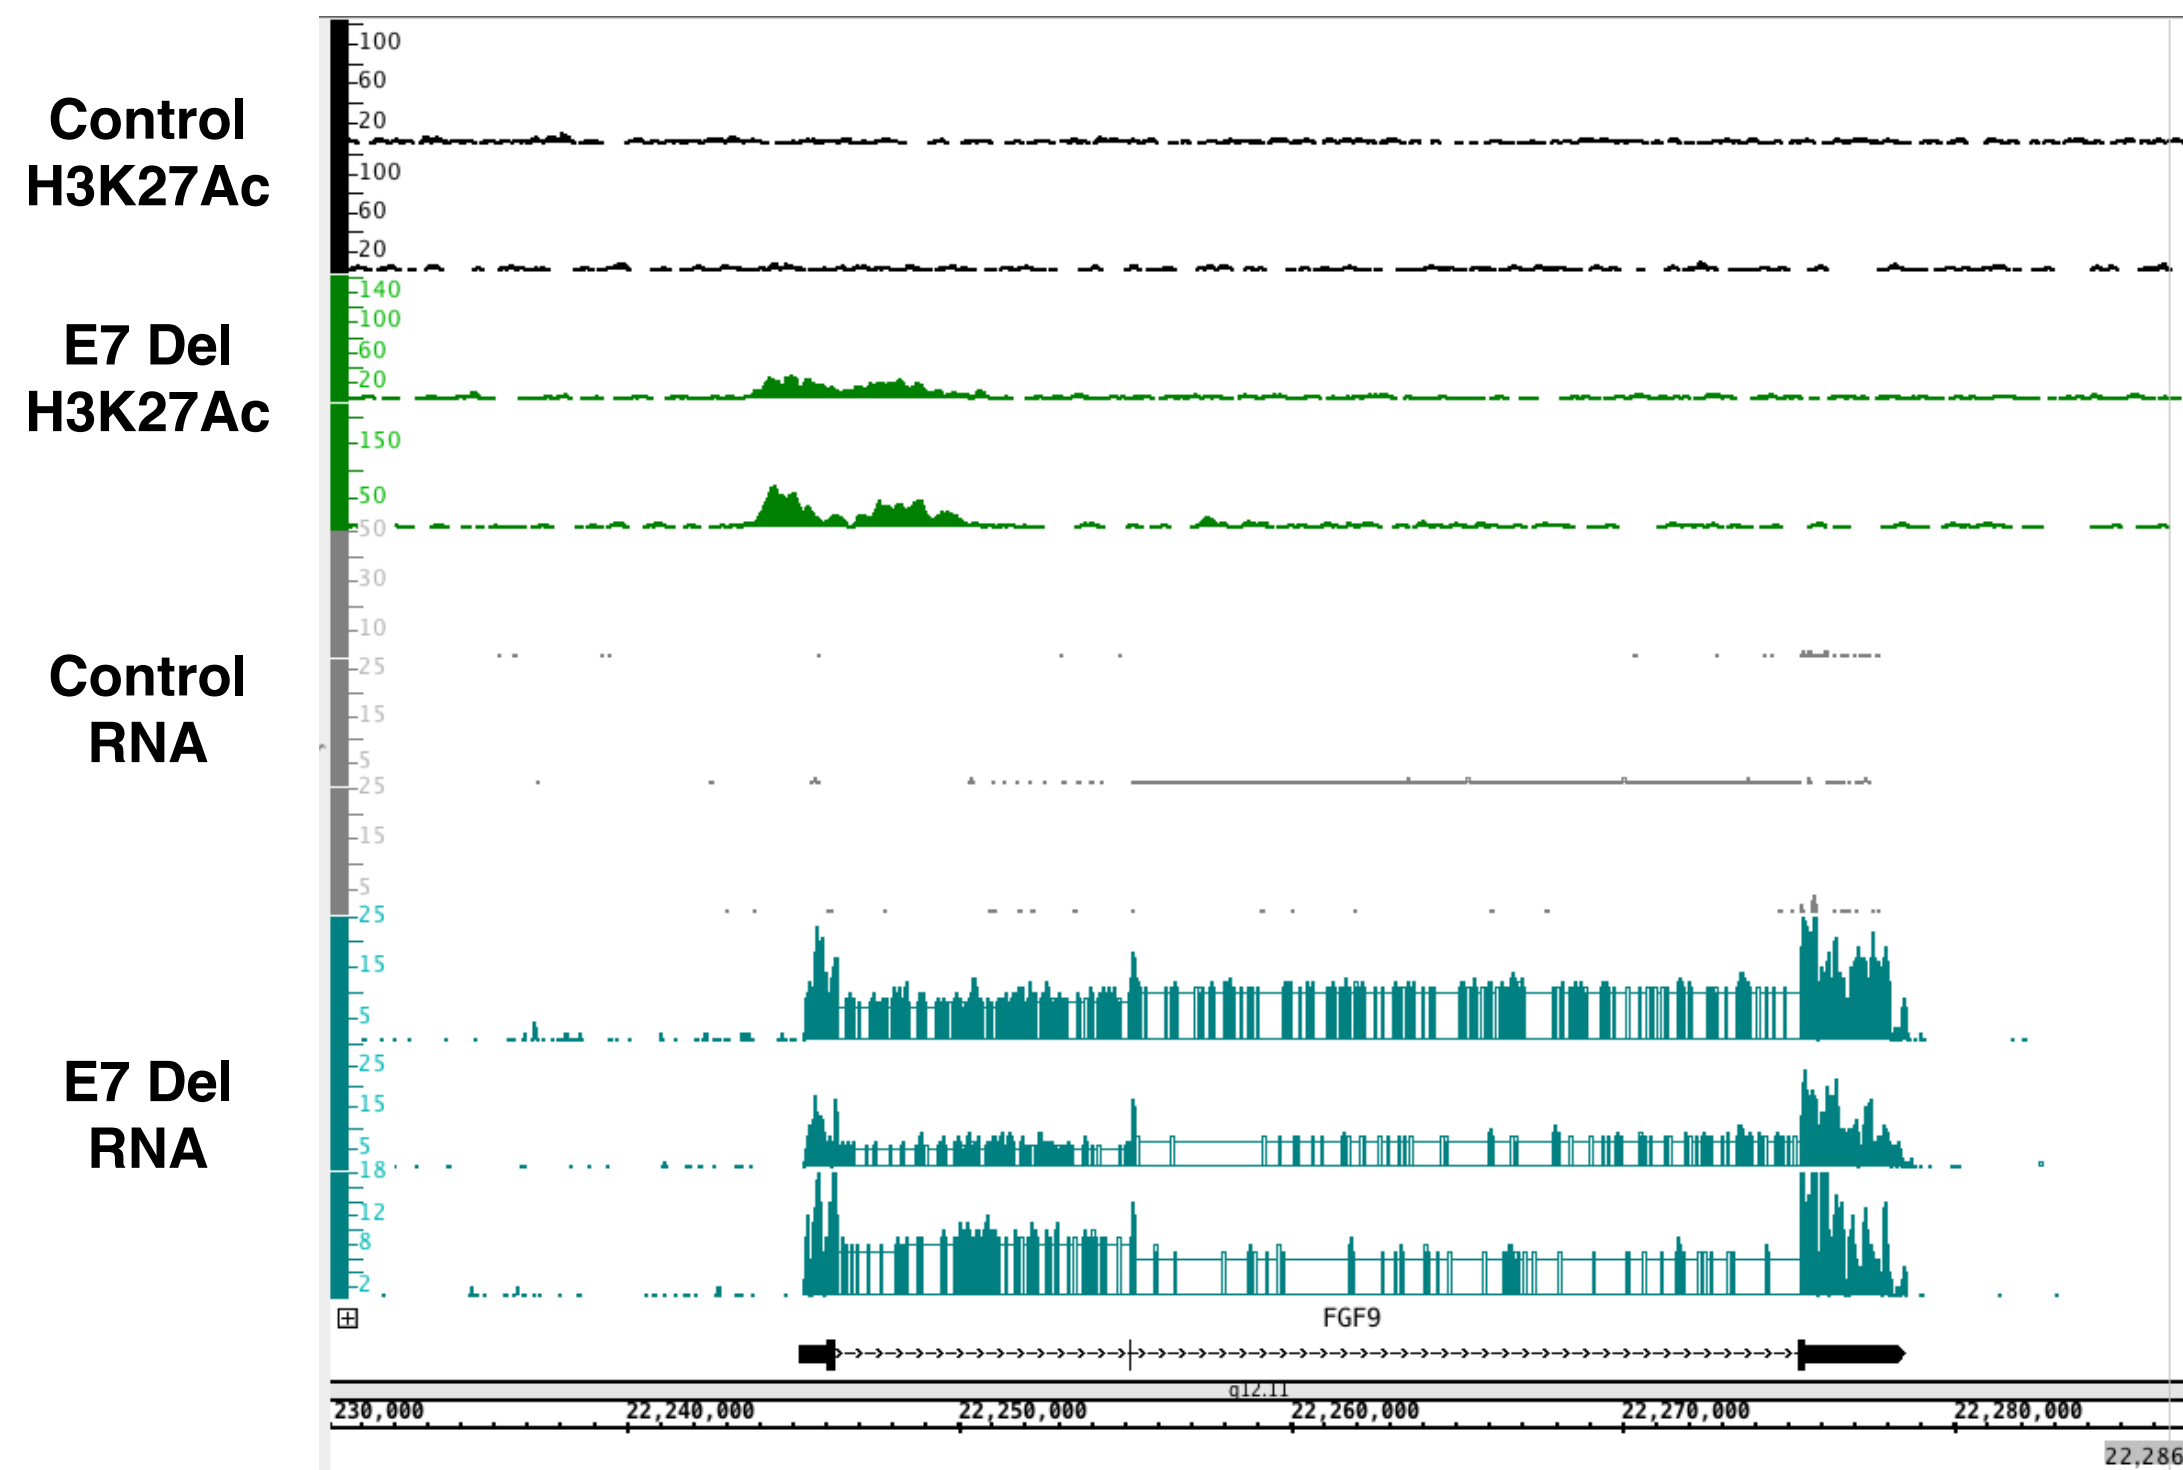**3**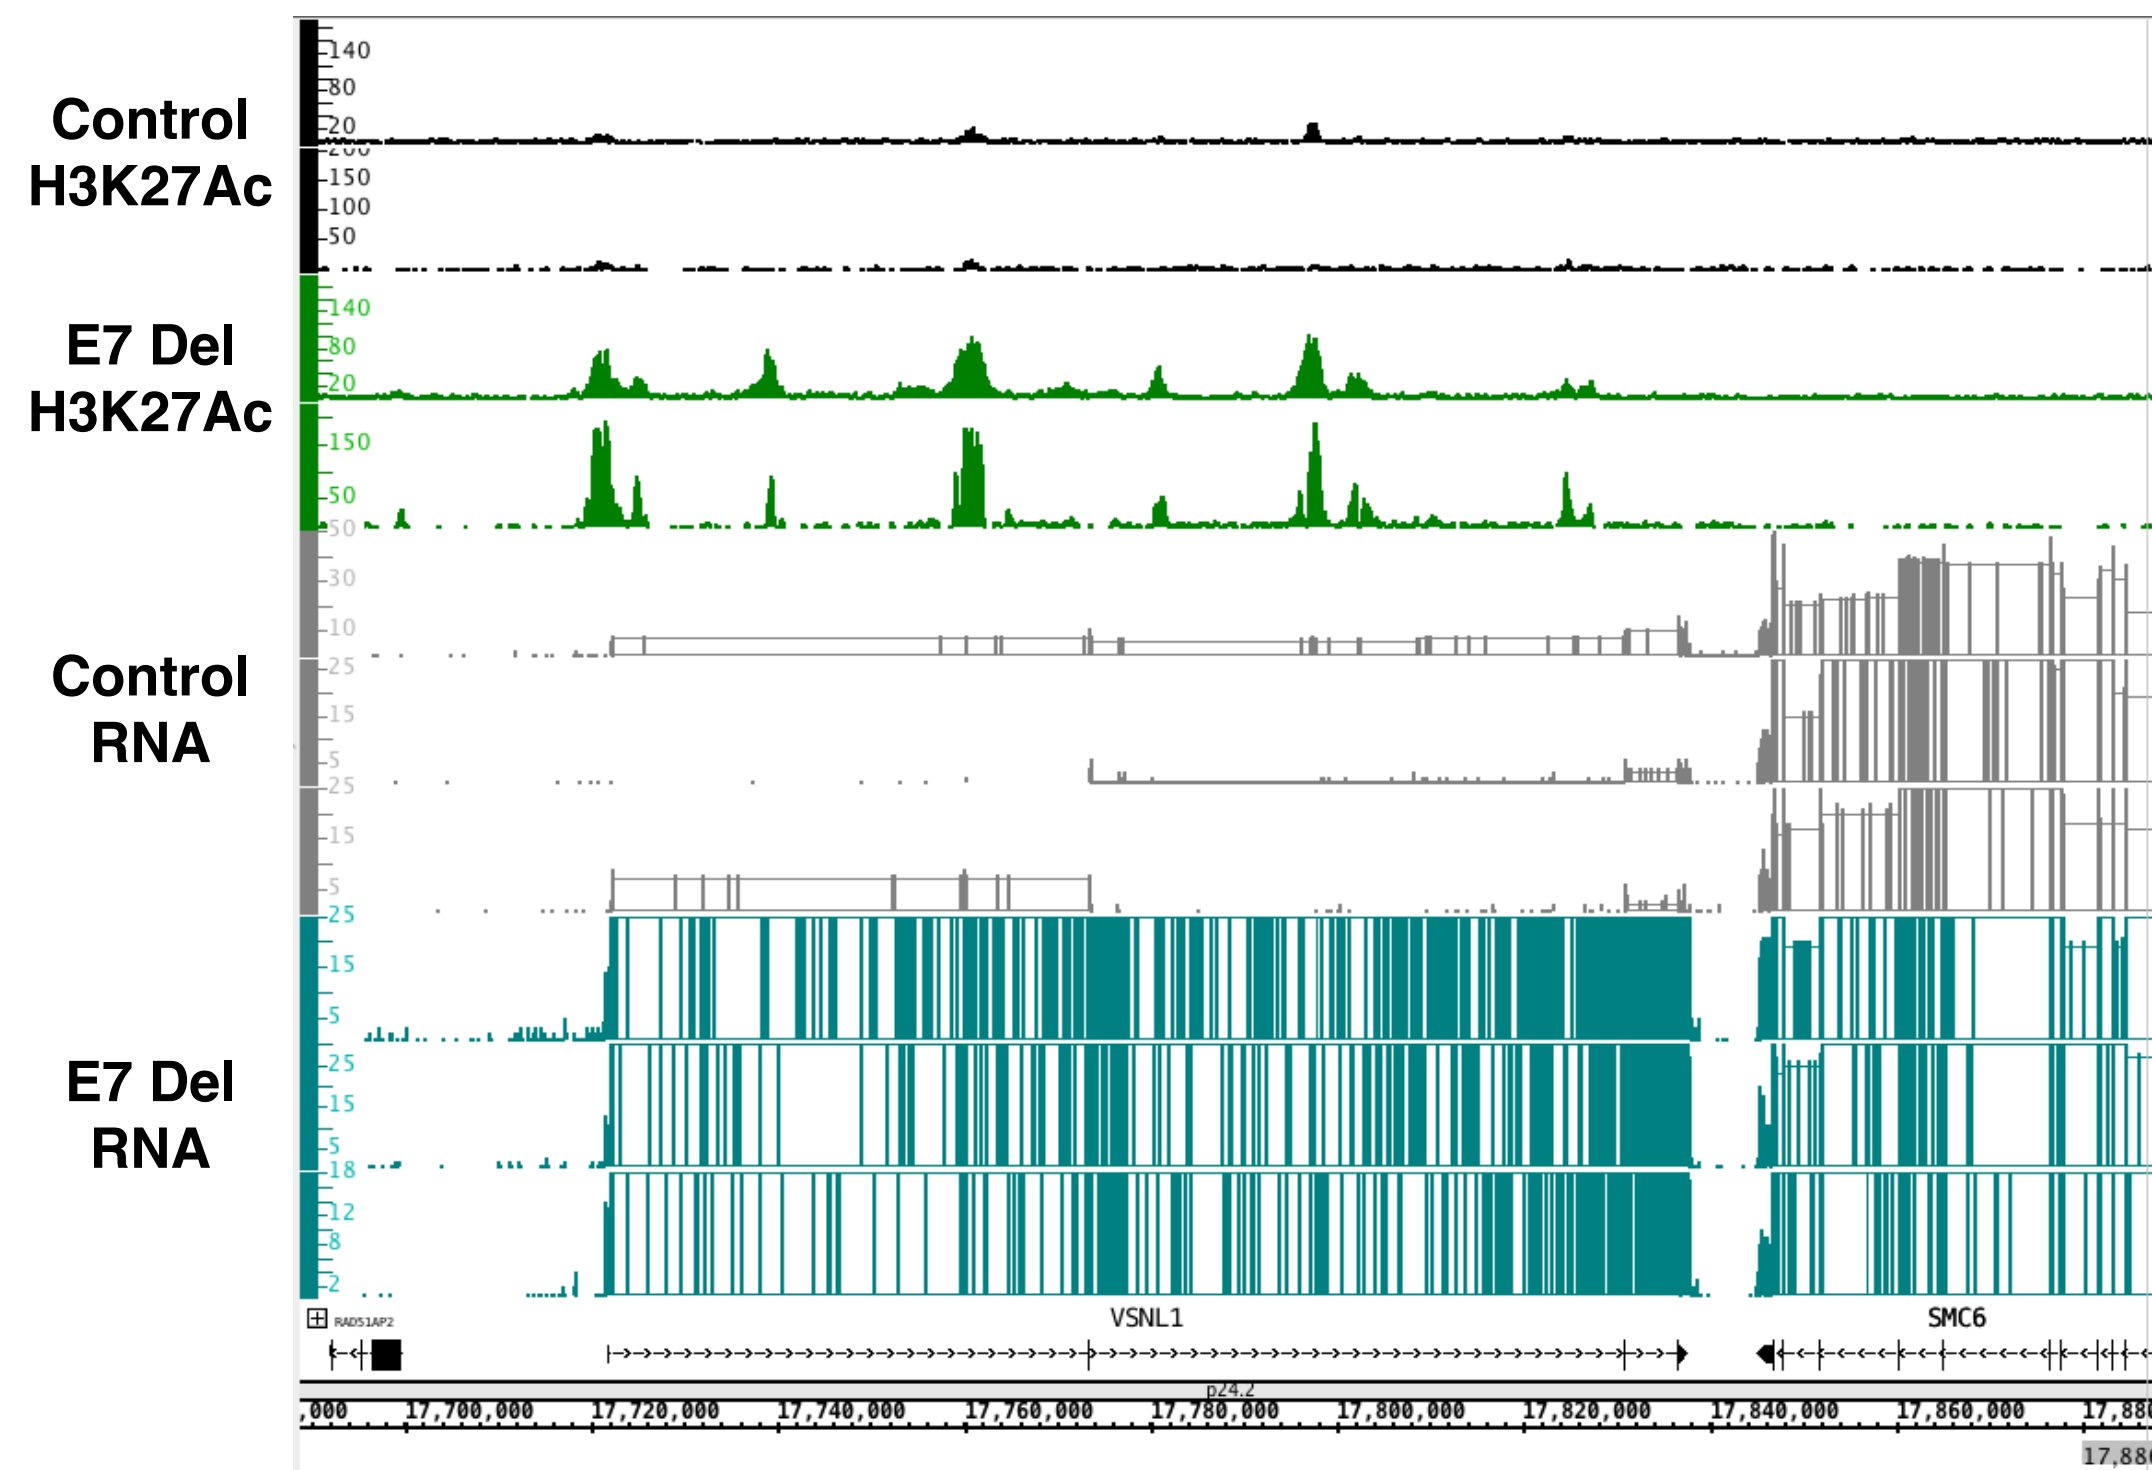

Supplement: supp_gkv1530_nar-03272-v-2015-File015.pdf [file supp_gkv1530_nar-03272-v-2015-File015.pdf]
