# Supplementary figures and images for: Effects on the transcriptome upon deletion of a distal element cannot be predicted by the size of the H3K27Ac peak in human cells
Source: PubMed Central journal article supplement — Nucleic Acids Res. 2016 Jan 6;44(9):4123–33. doi: 10.1093/nar/gkv1530 (PMC4872074; doi:10.1093/nar/gkv1530), 2016-01-06

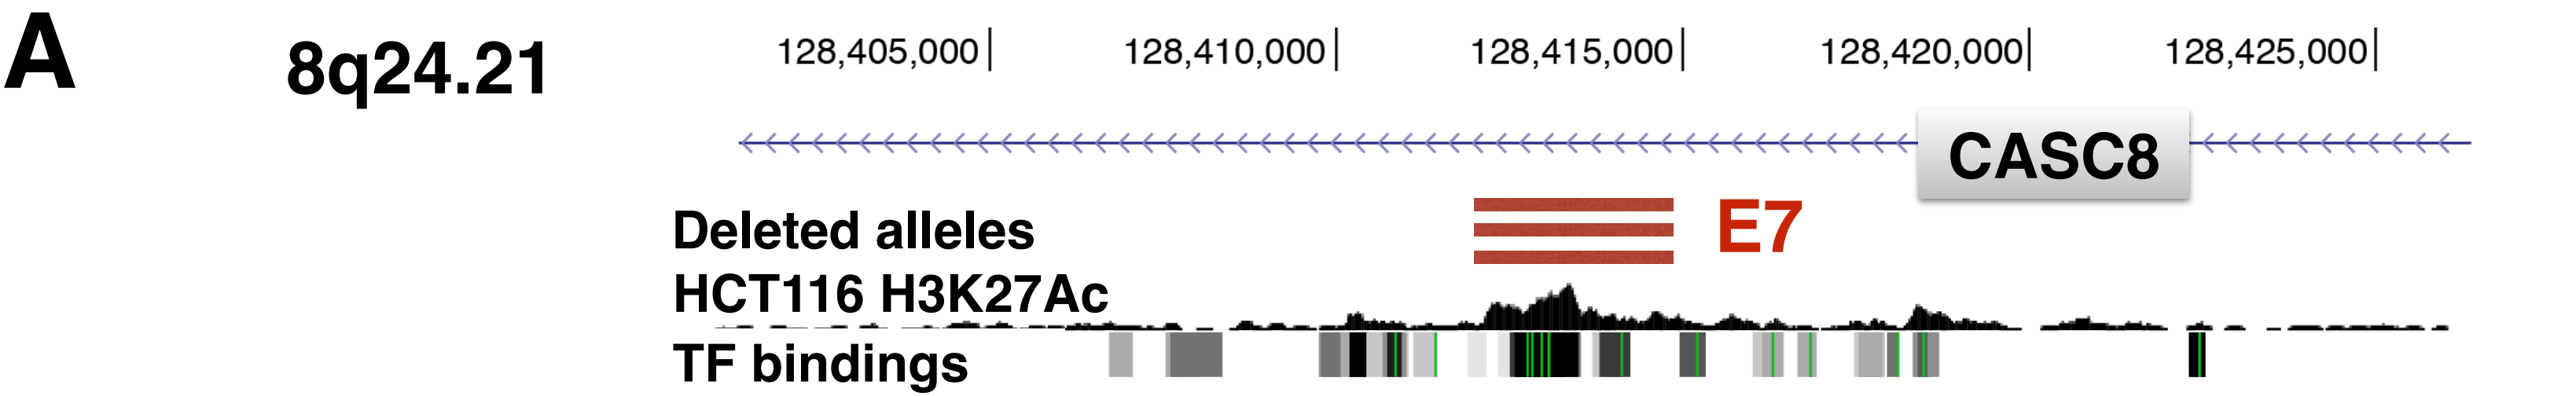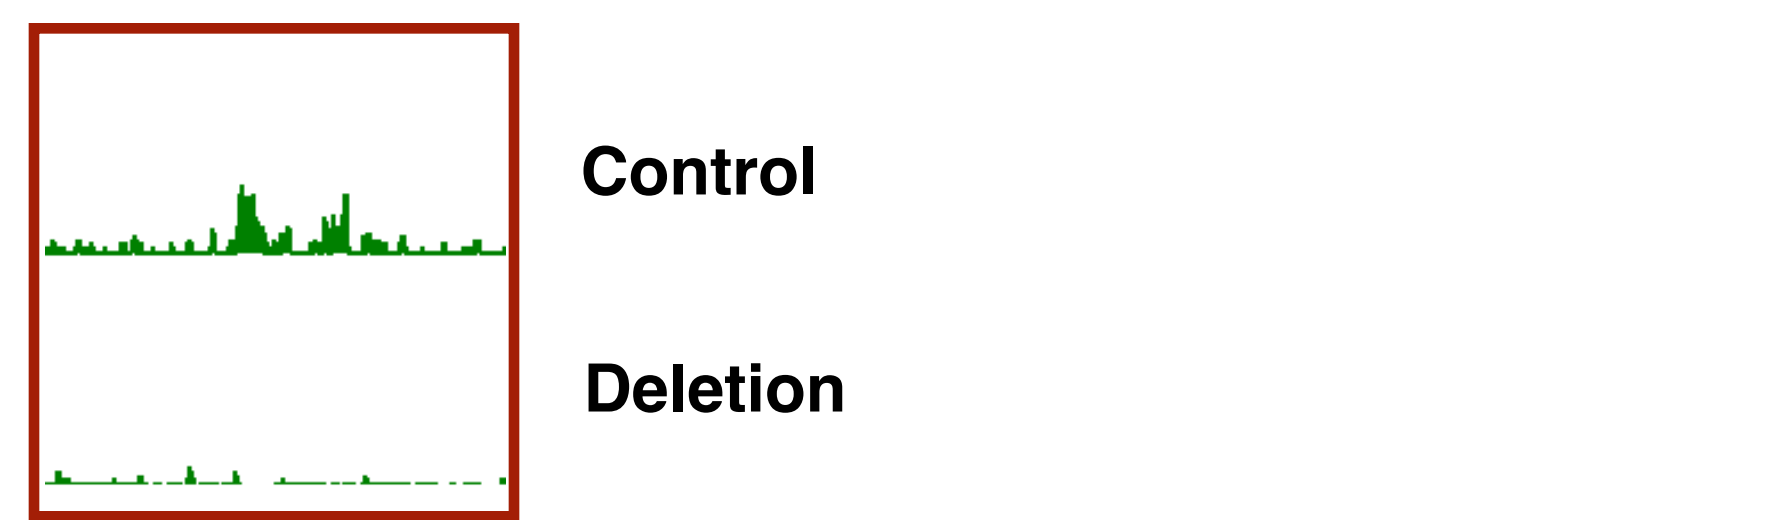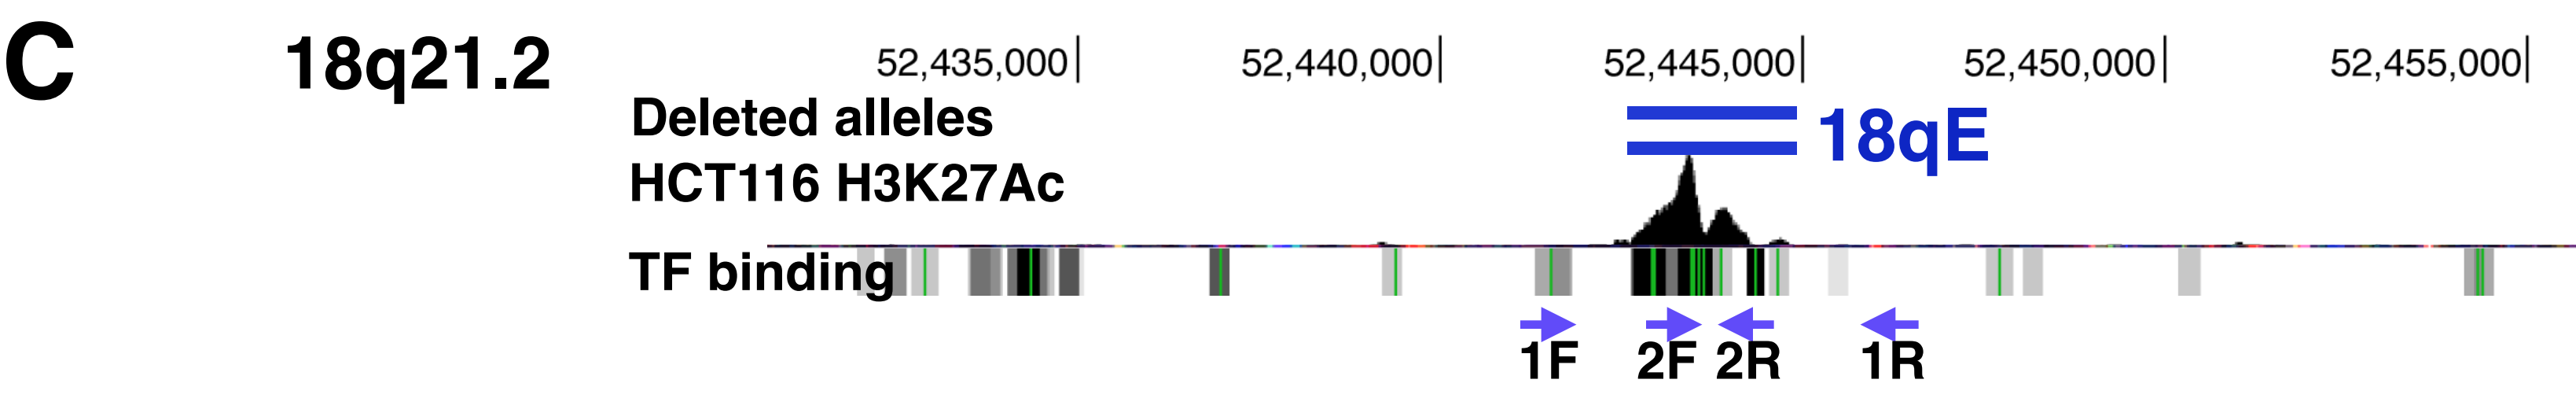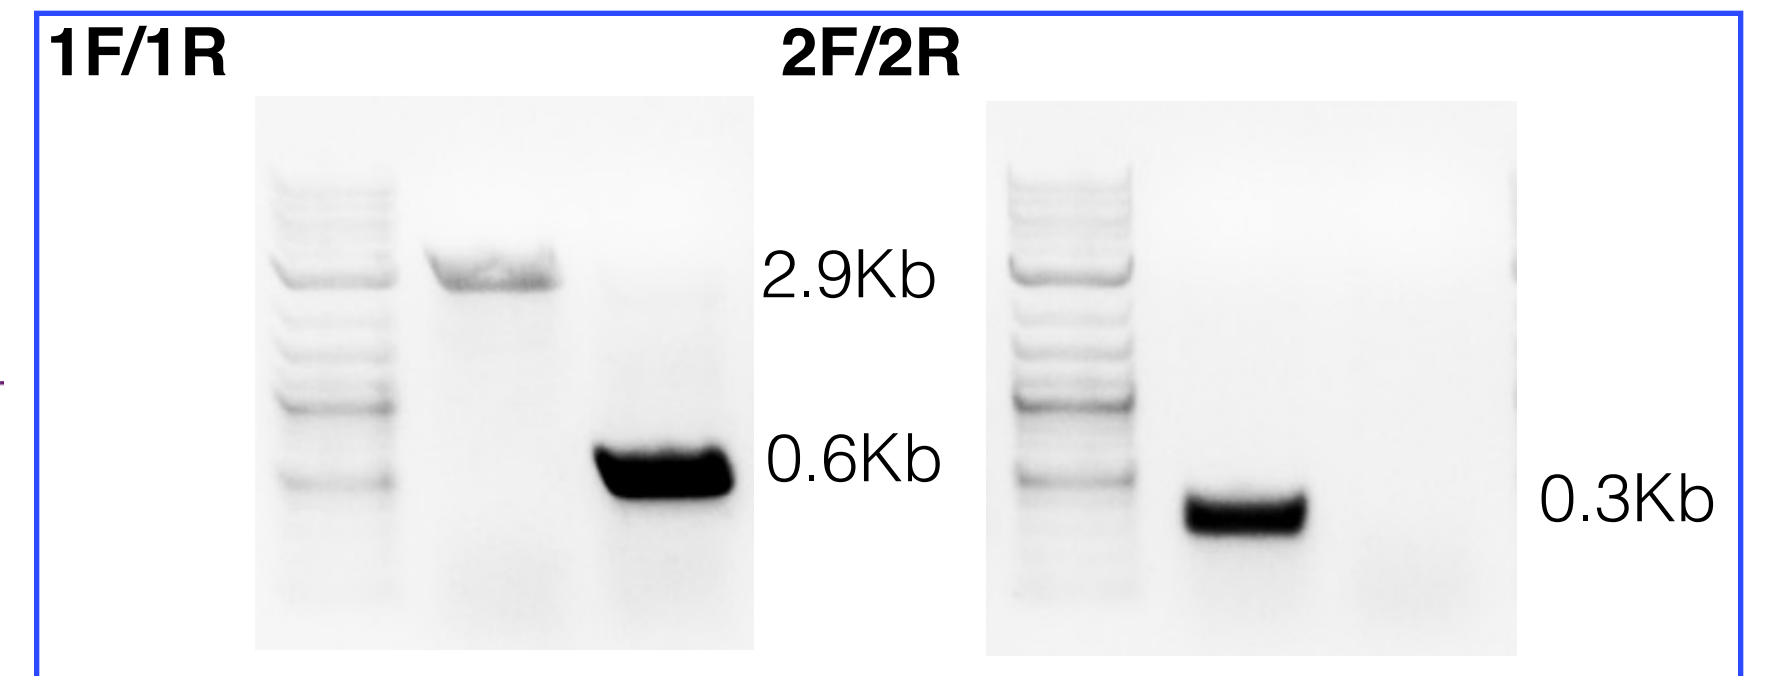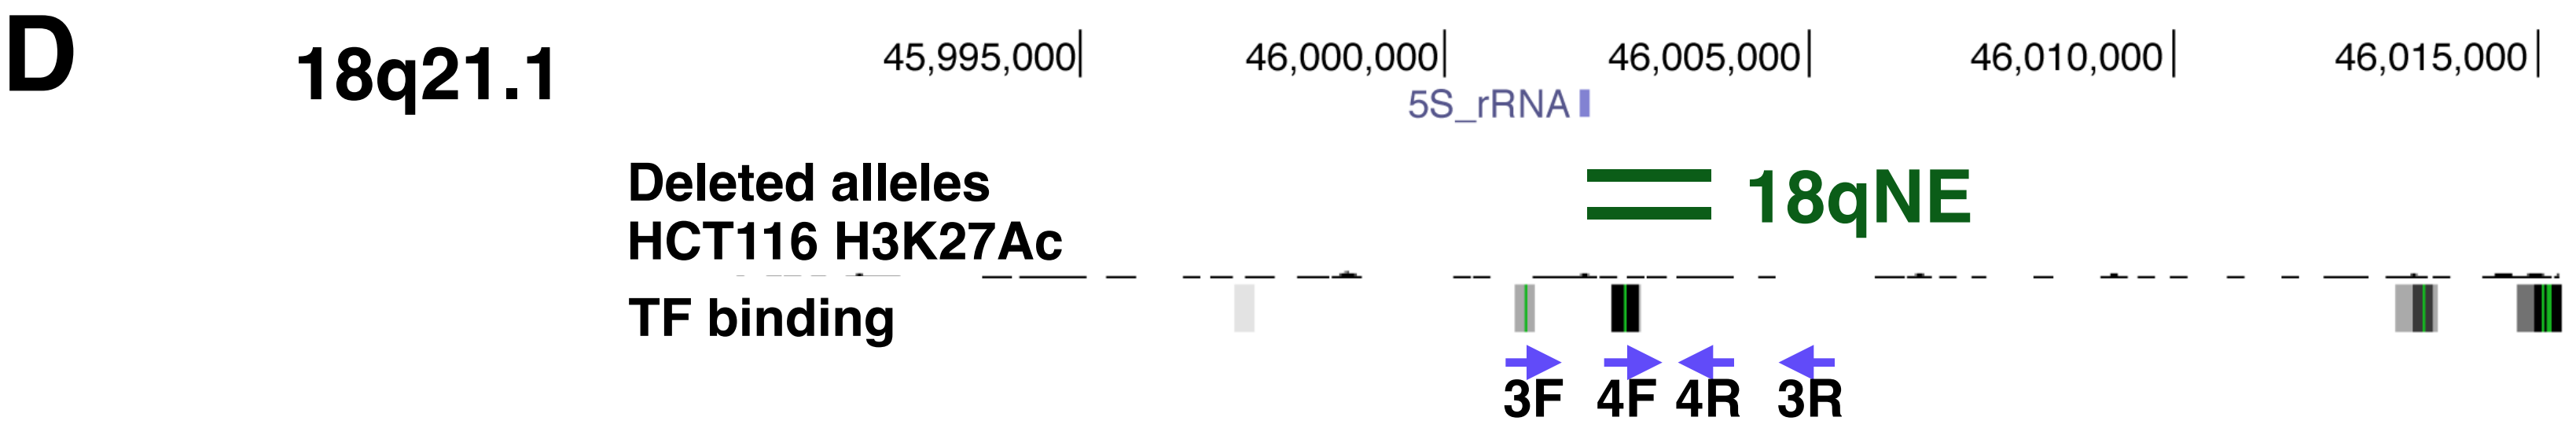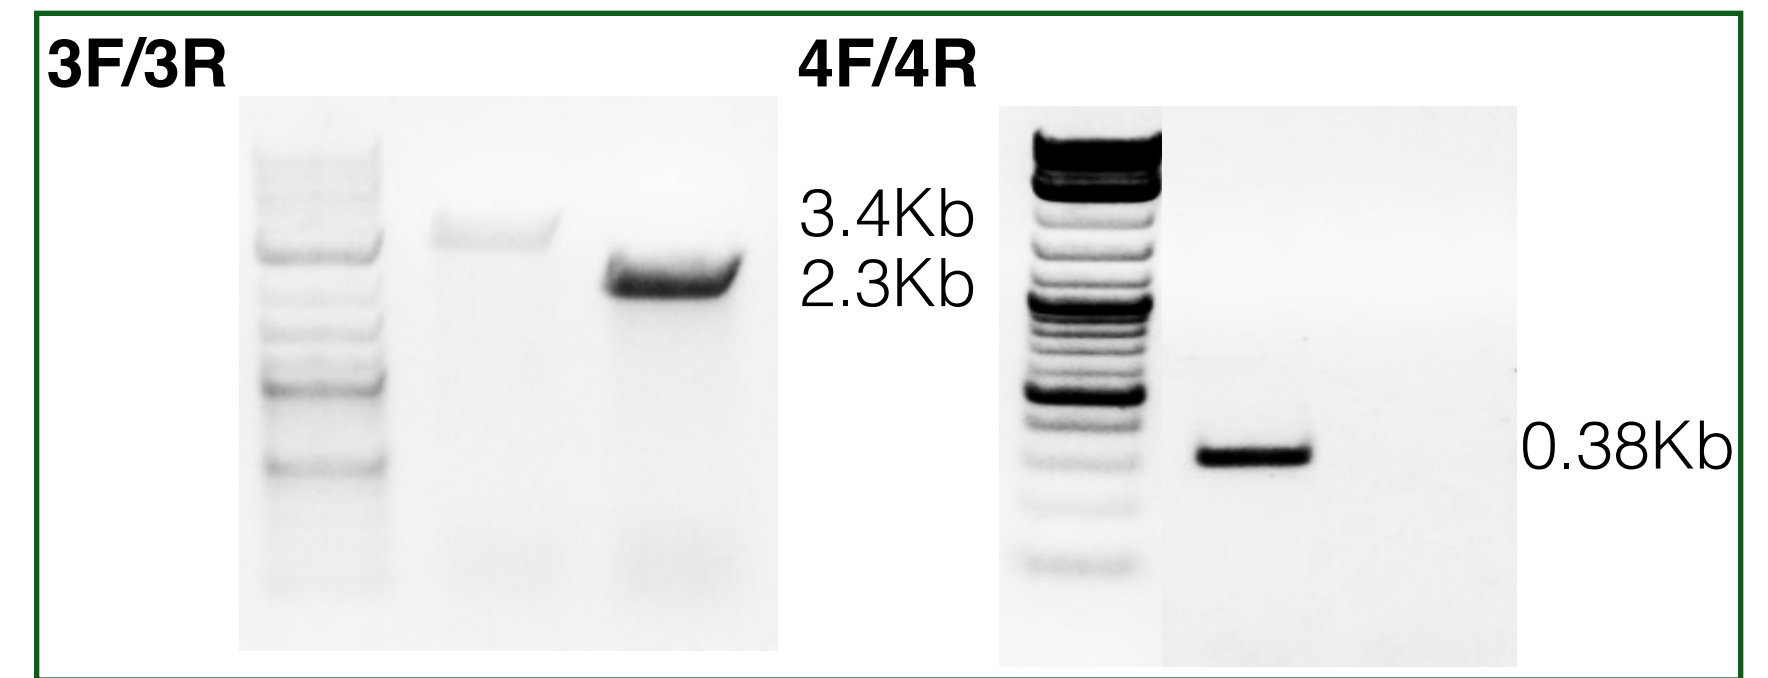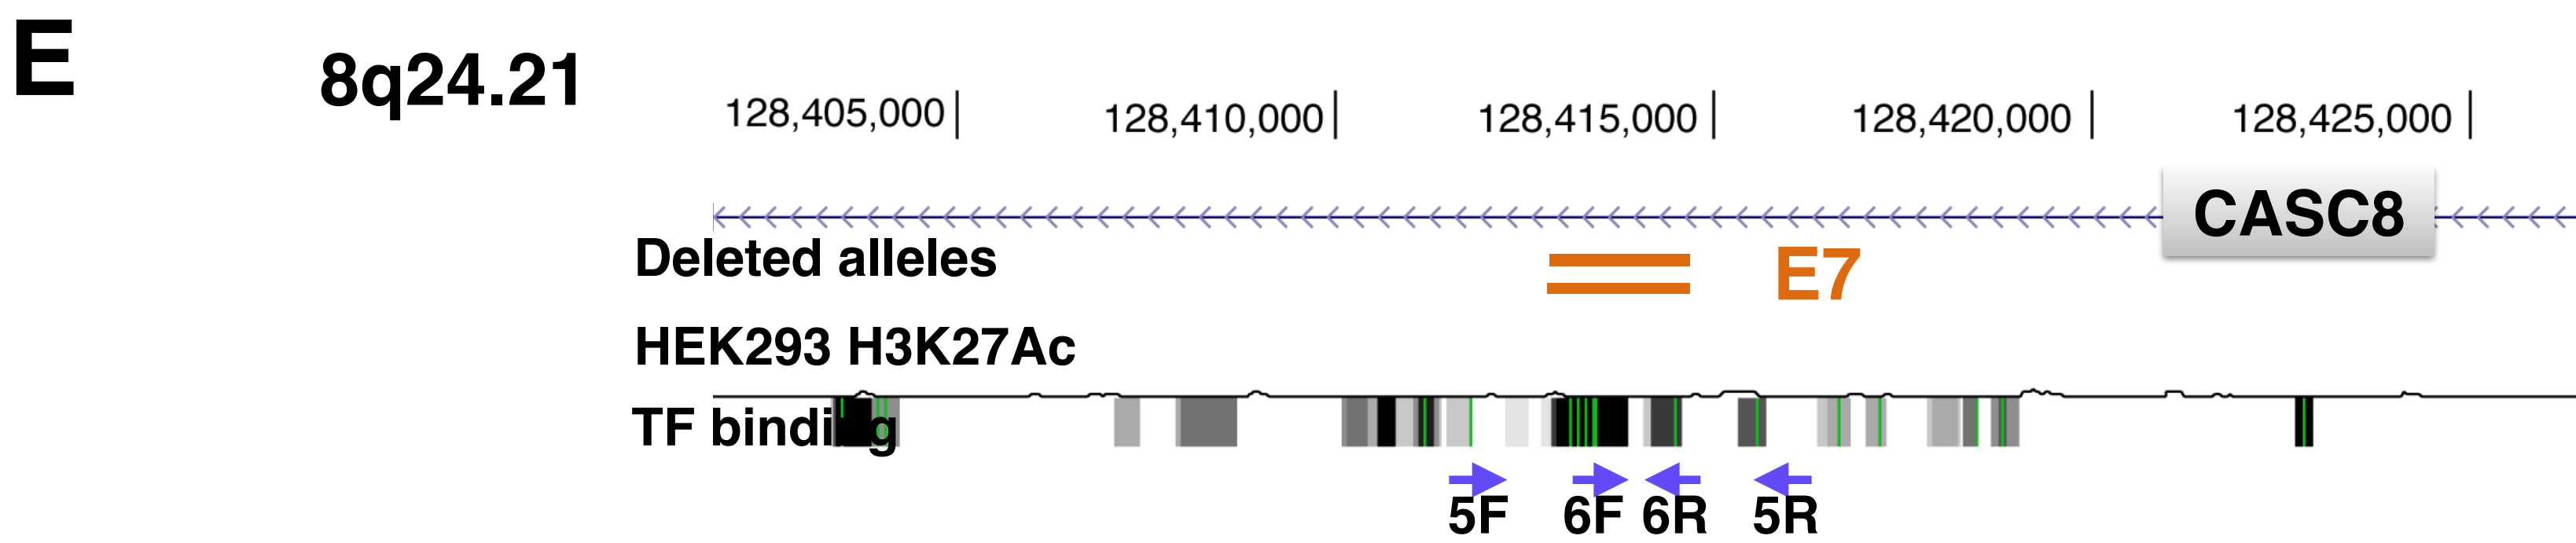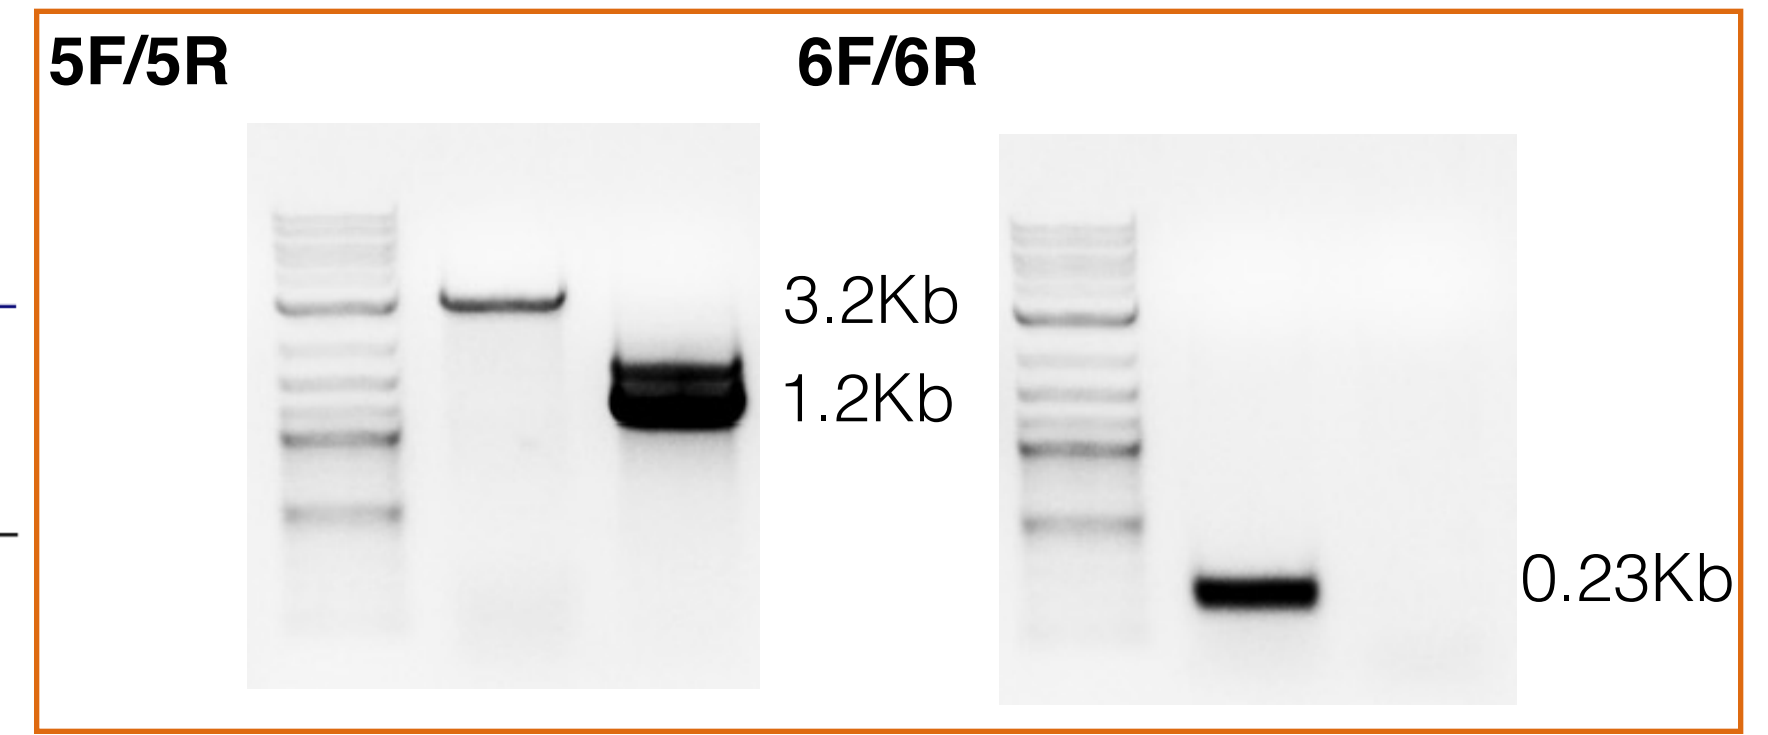

Supplement: supp_gkv1530_nar-03272-v-2015-File011.pdf [file supp_gkv1530_nar-03272-v-2015-File011.pdf]

**A**

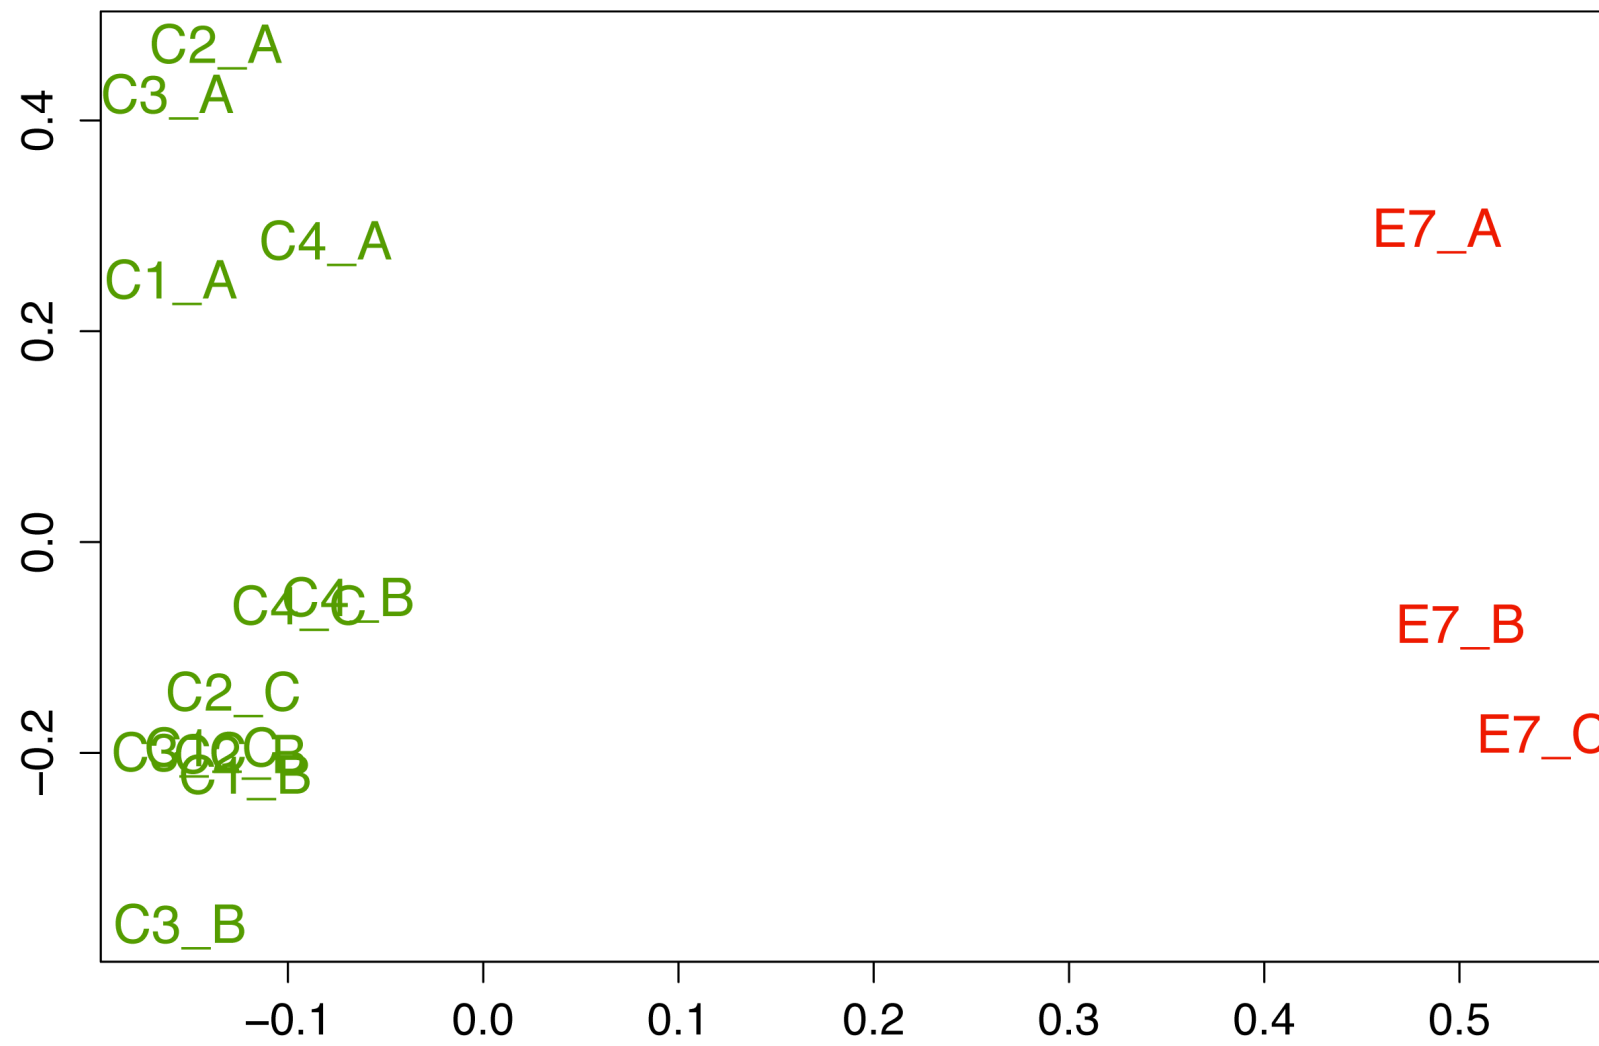

**B**

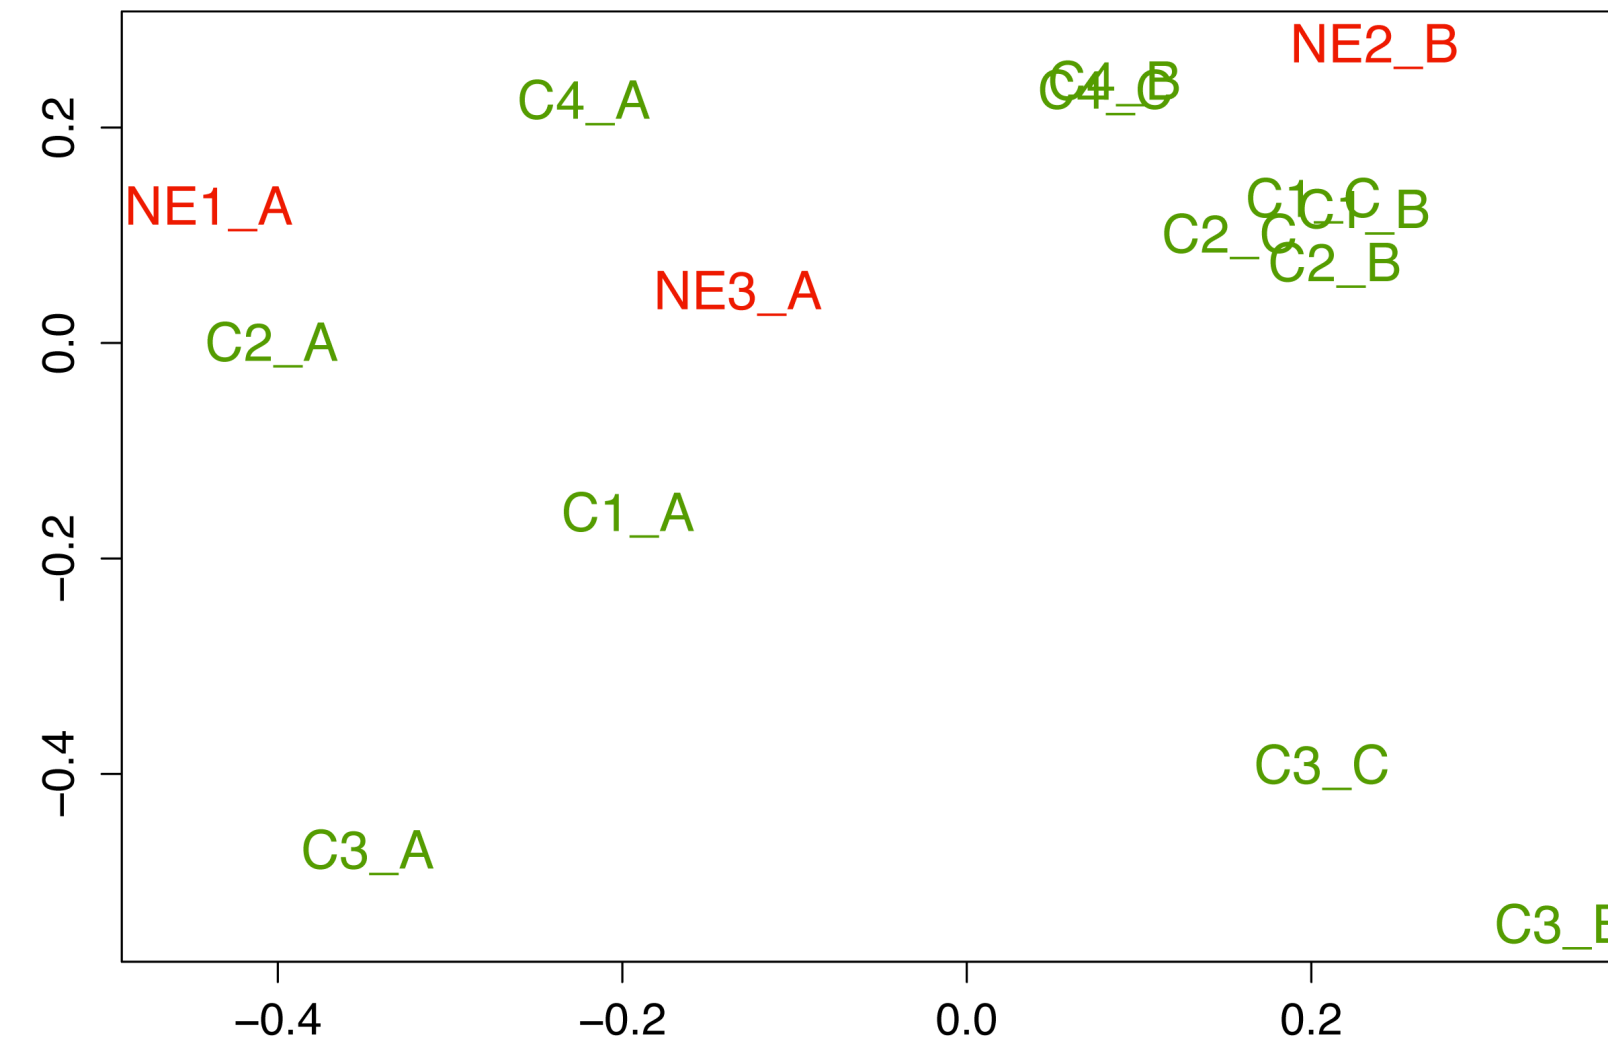

**C**

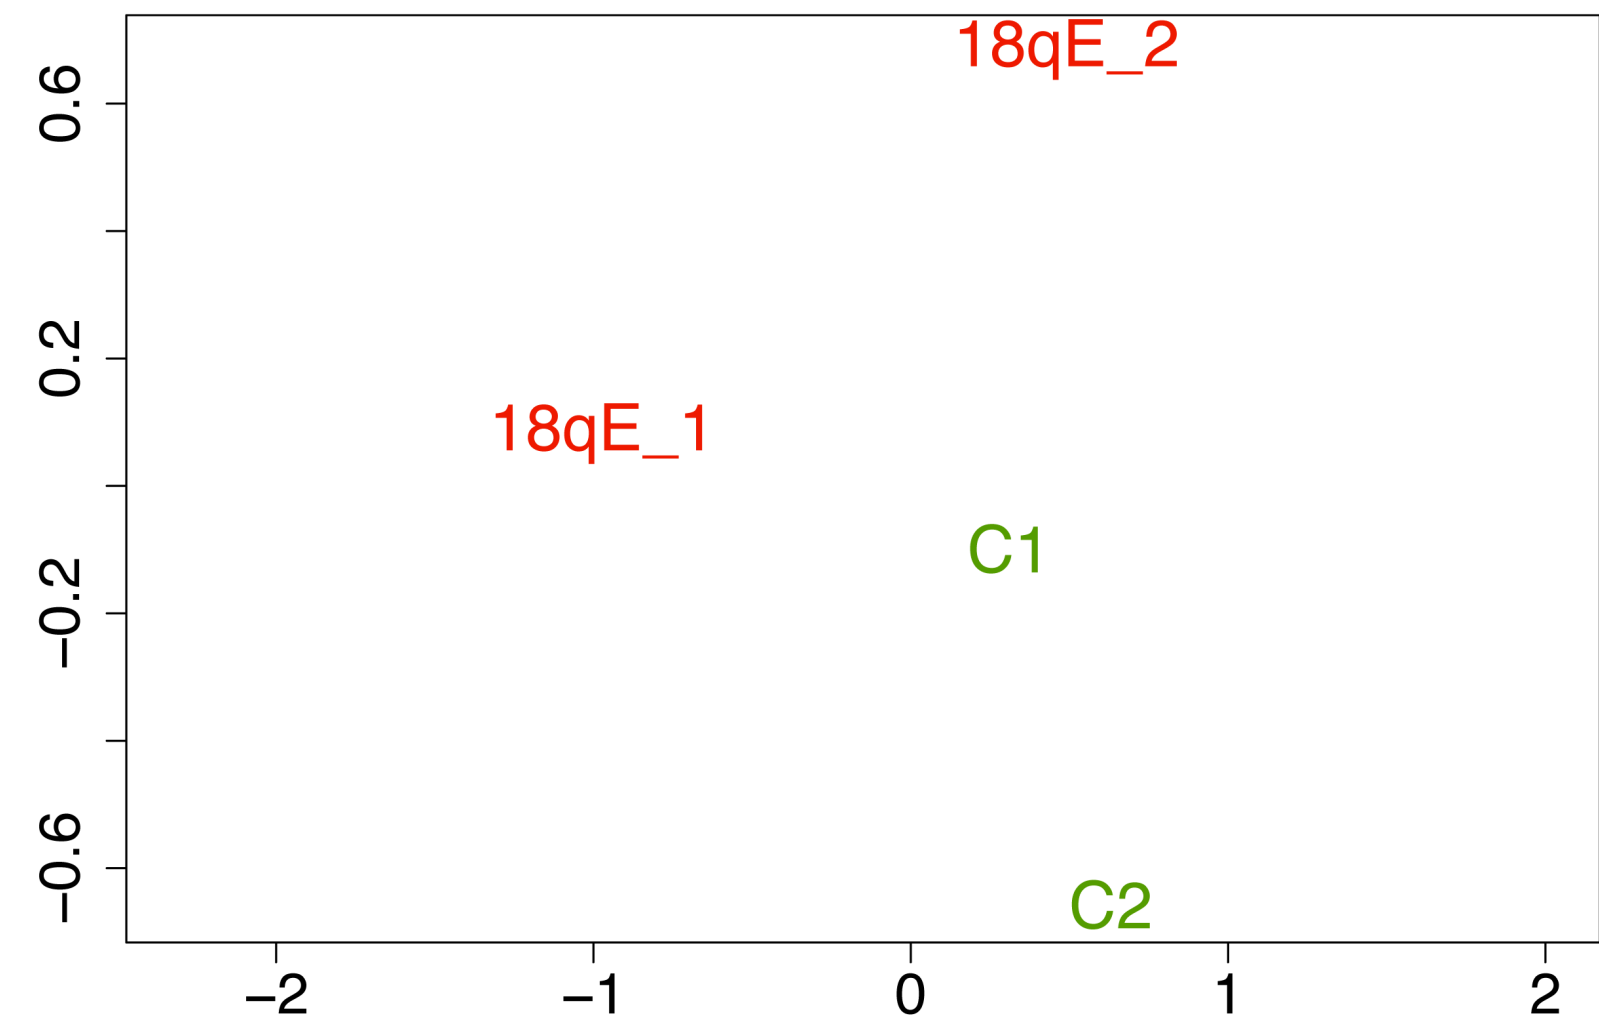

**D**

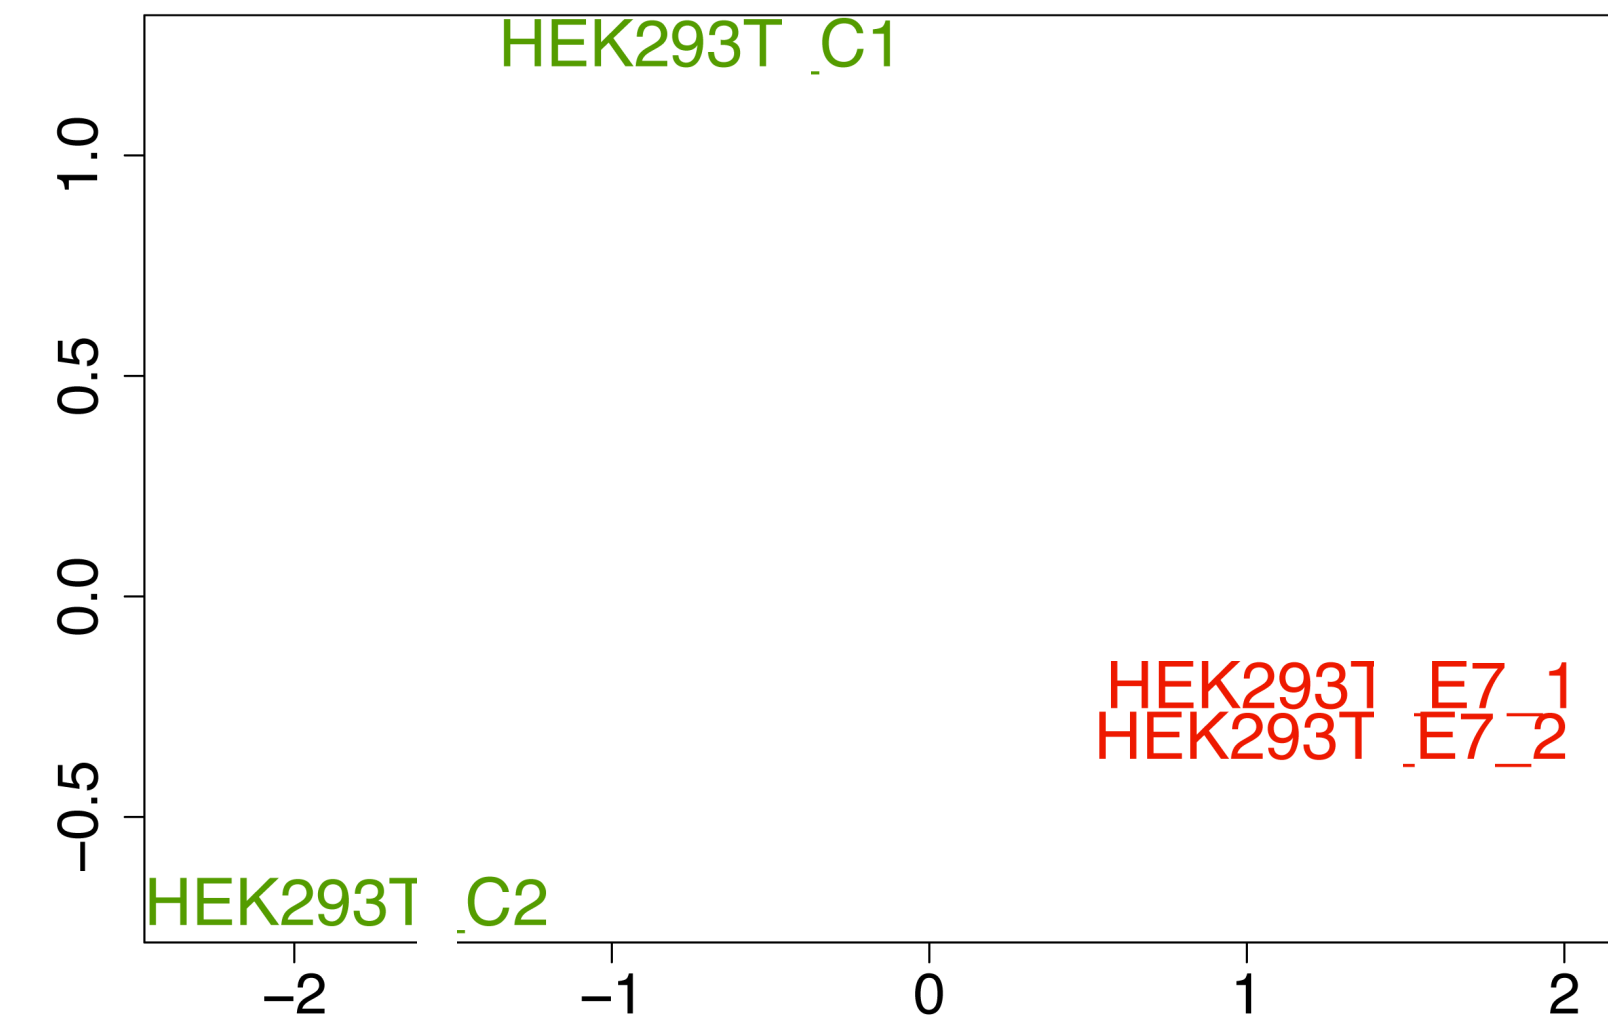

x-axis: PC1  
y-axis: PC2

Supplement: supp_gkv1530_nar-03272-v-2015-File013.pdf [file supp_gkv1530_nar-03272-v-2015-File013.pdf]

**A**

**HCT116**

**Control**

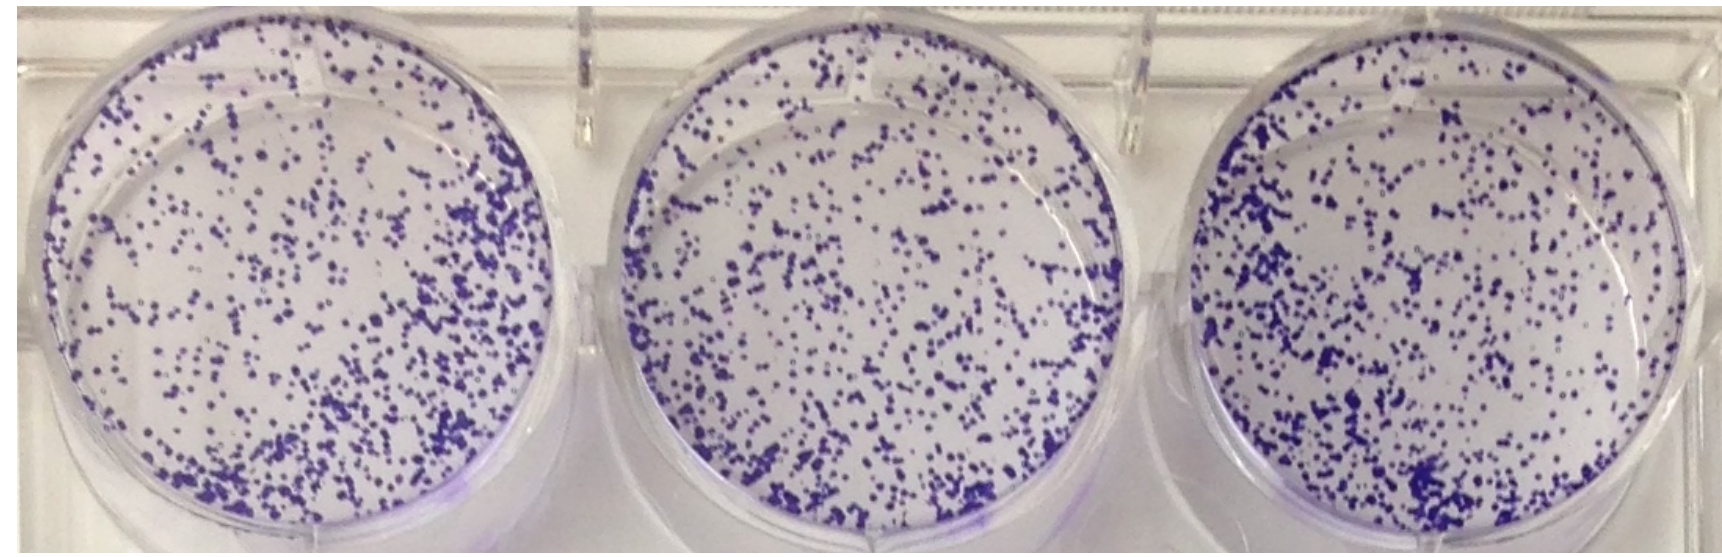

**E7 Deletion**

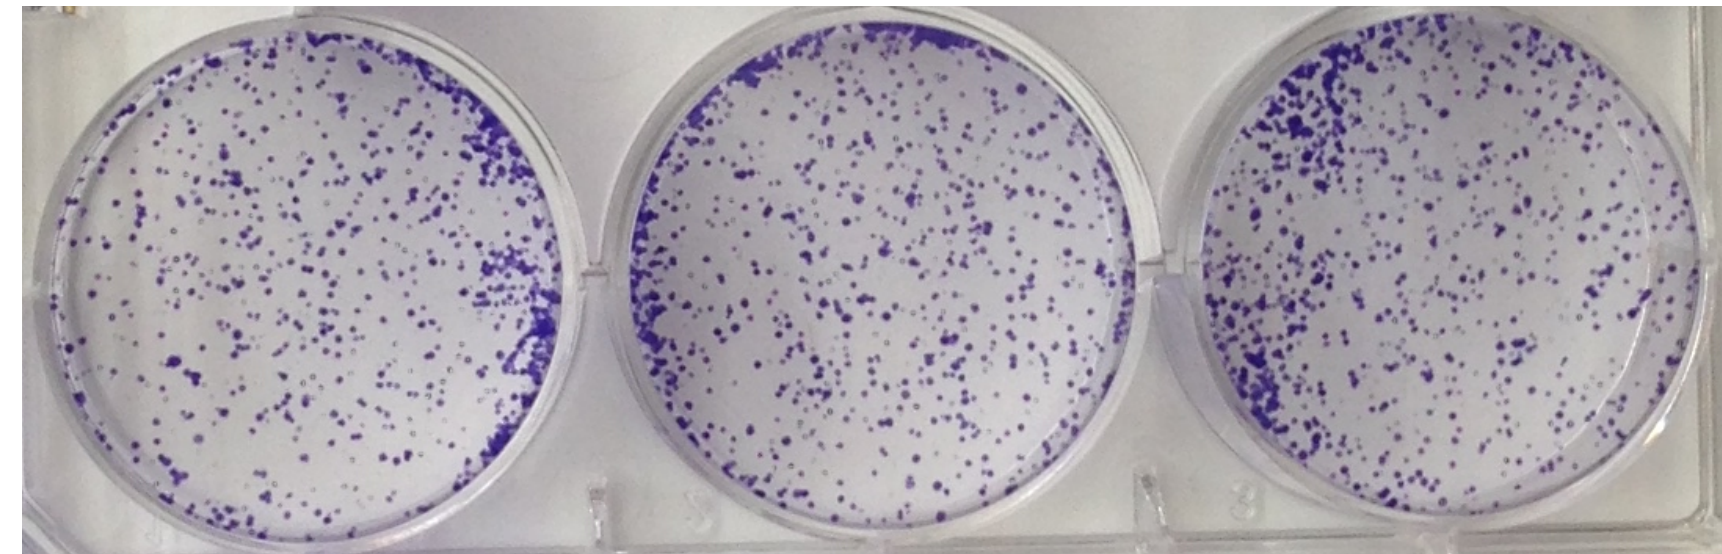

**C**

**HEK 293**

**Control**

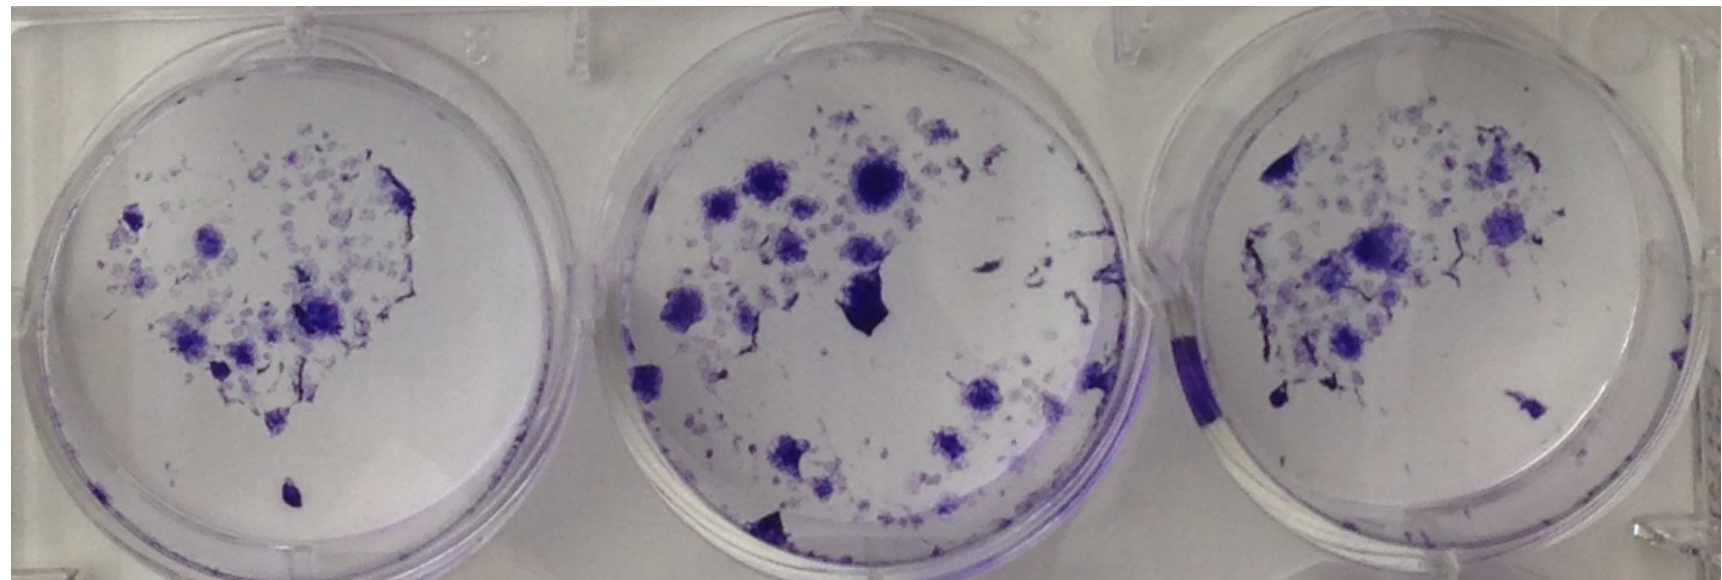

**E7 Deletion**

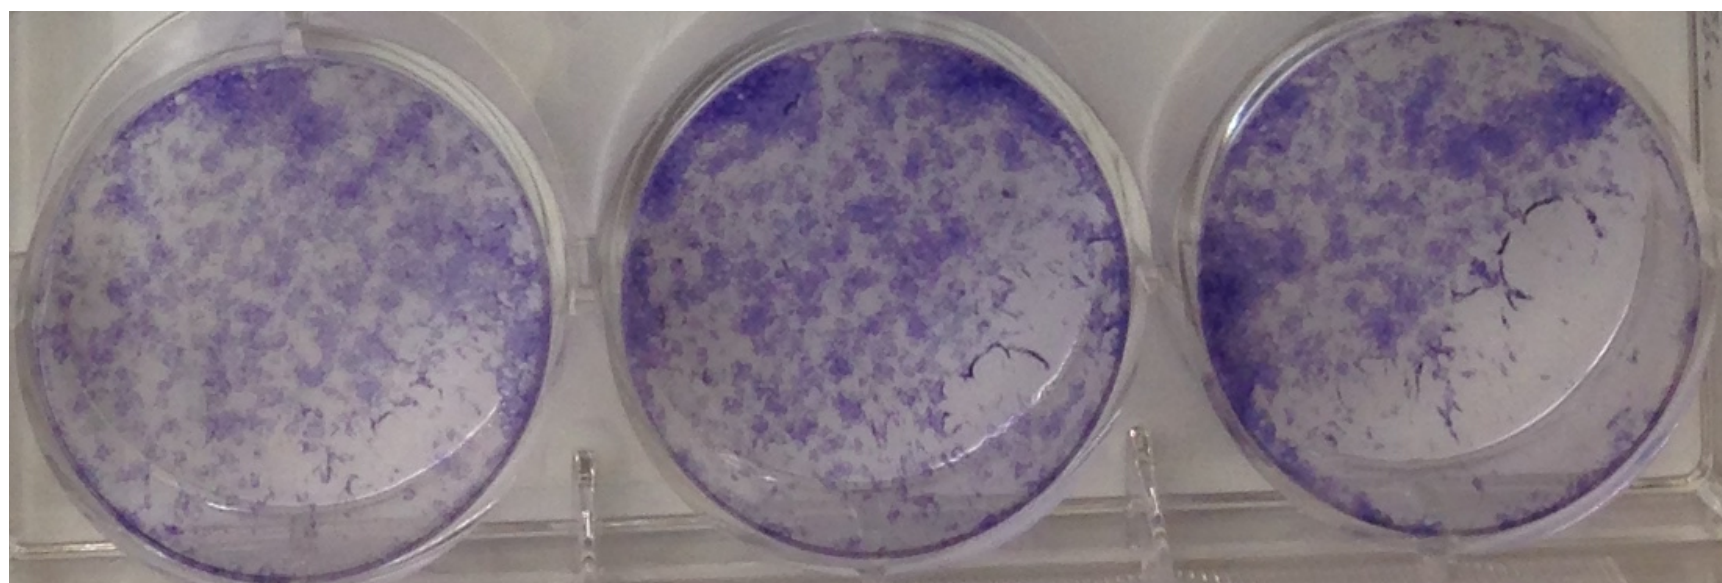

**B**

**HCT116**

**Control**

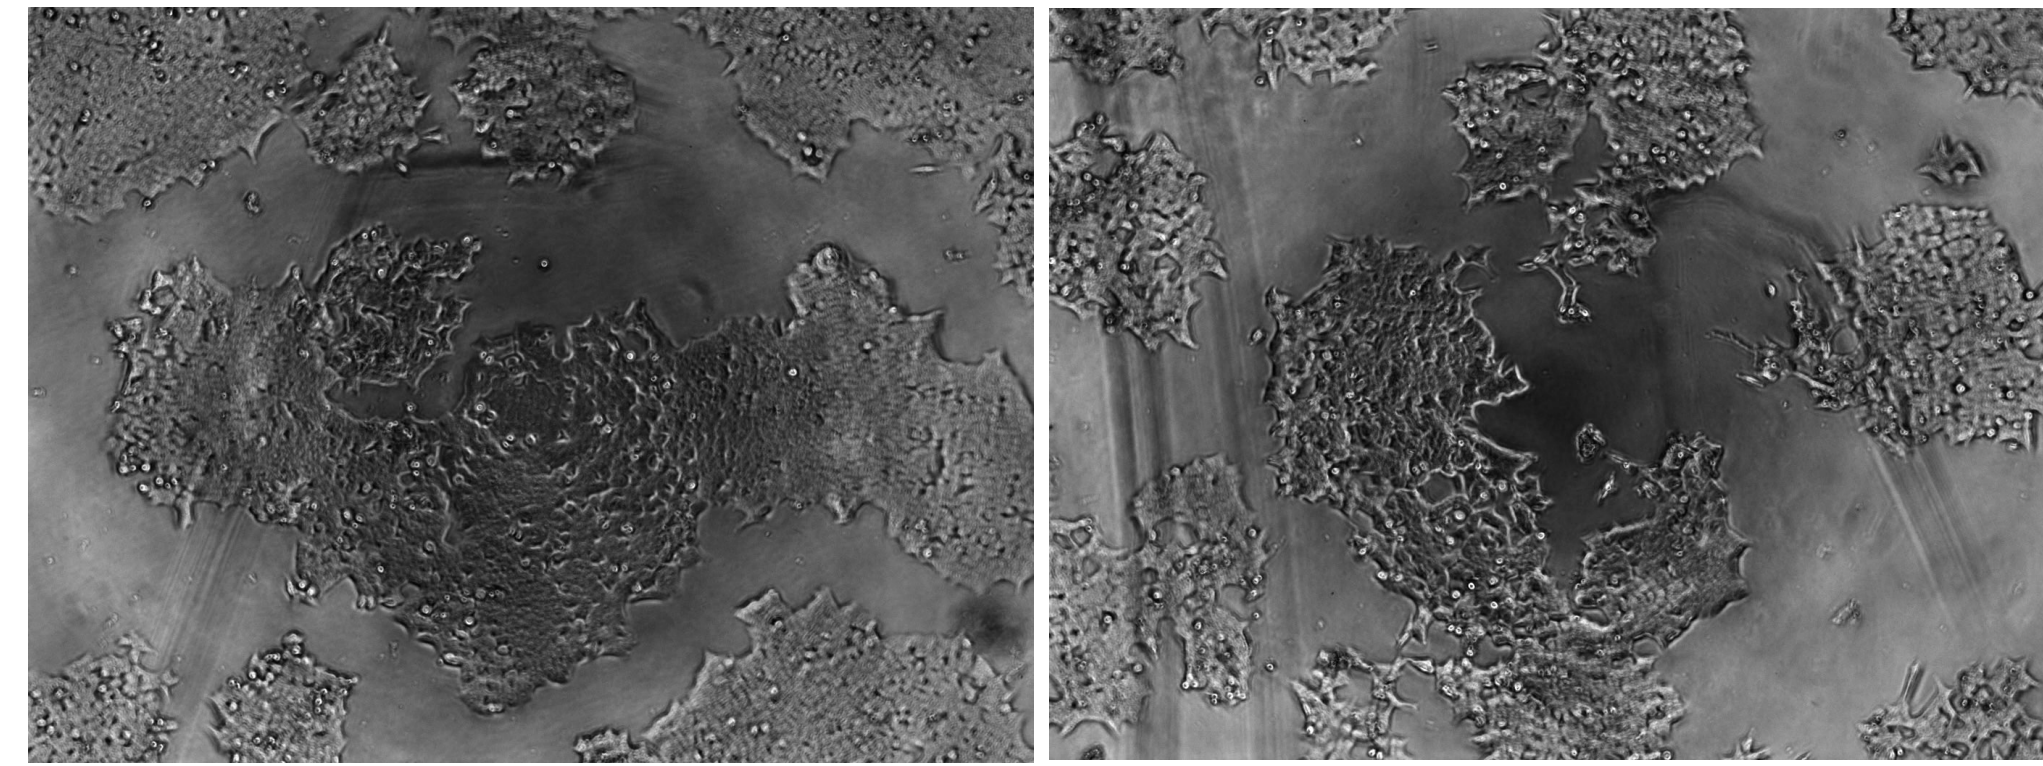

**E7 Deletion**

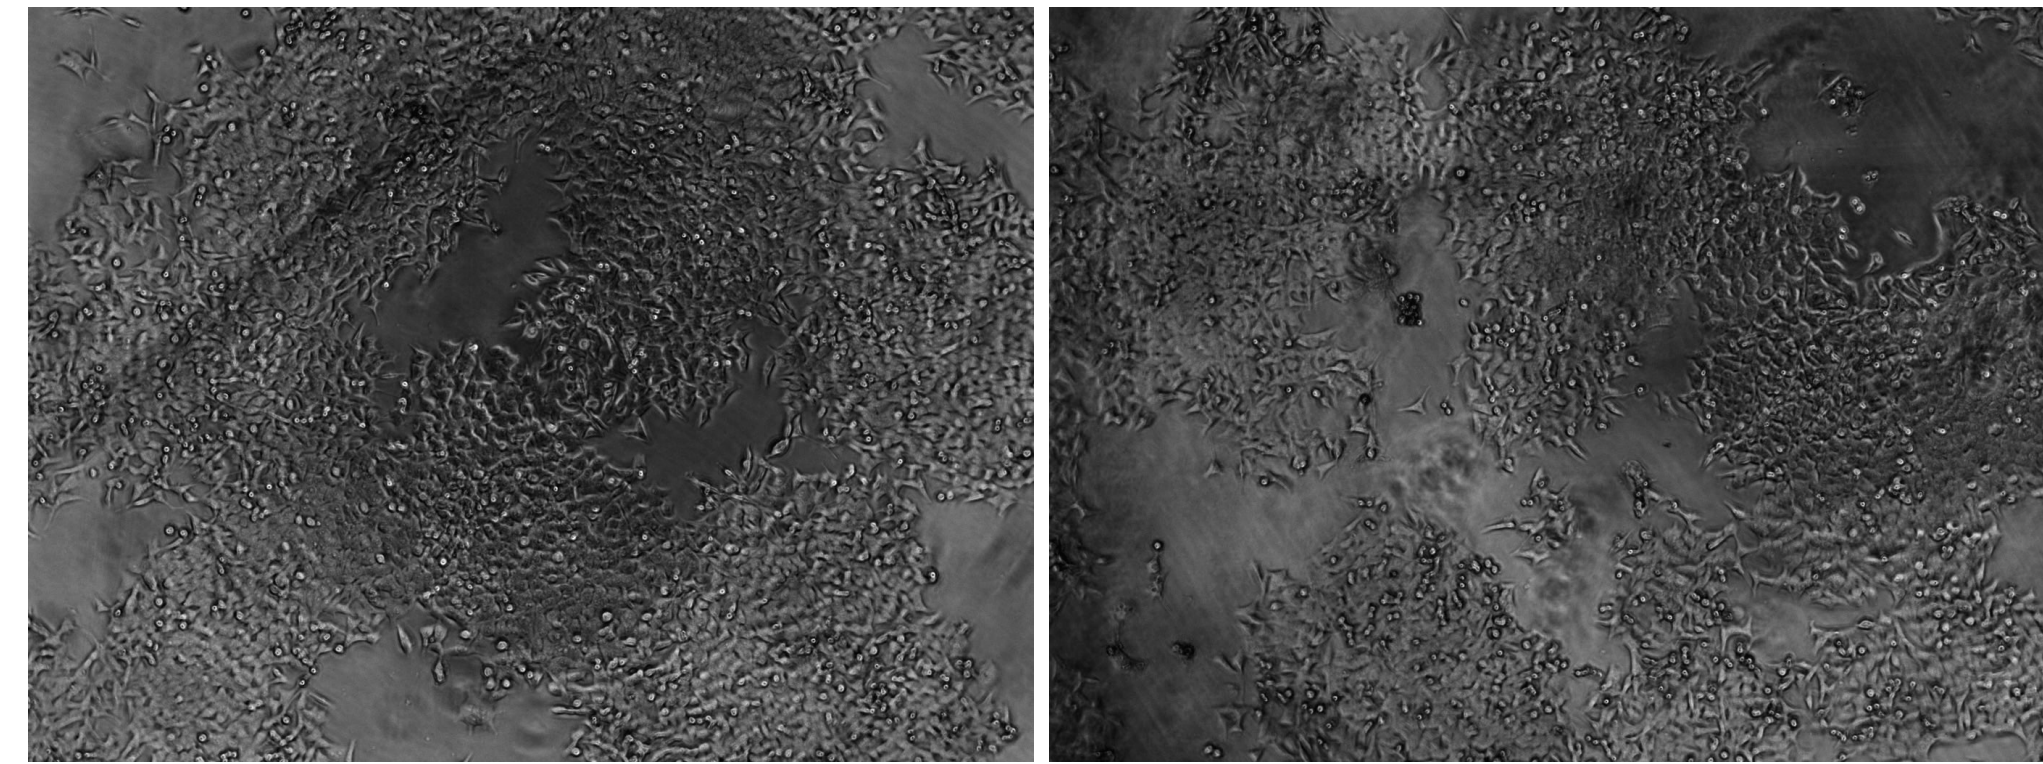

Supplement: supp_gkv1530_nar-03272-v-2015-File017.pdf [file supp_gkv1530_nar-03272-v-2015-File017.pdf]

## A

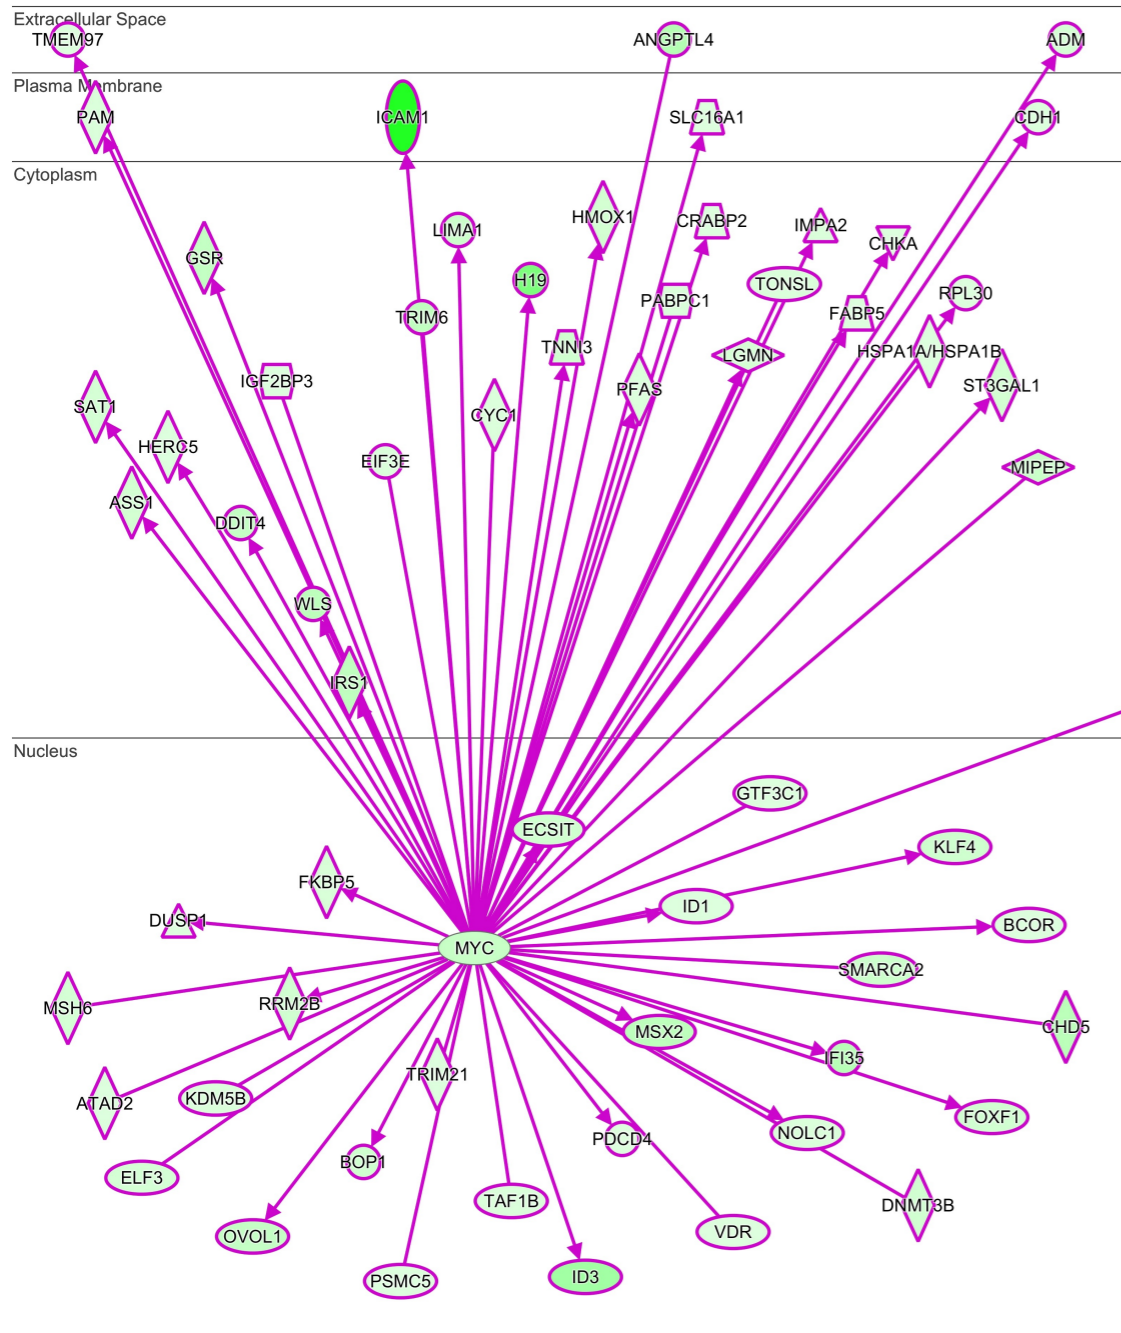

## B

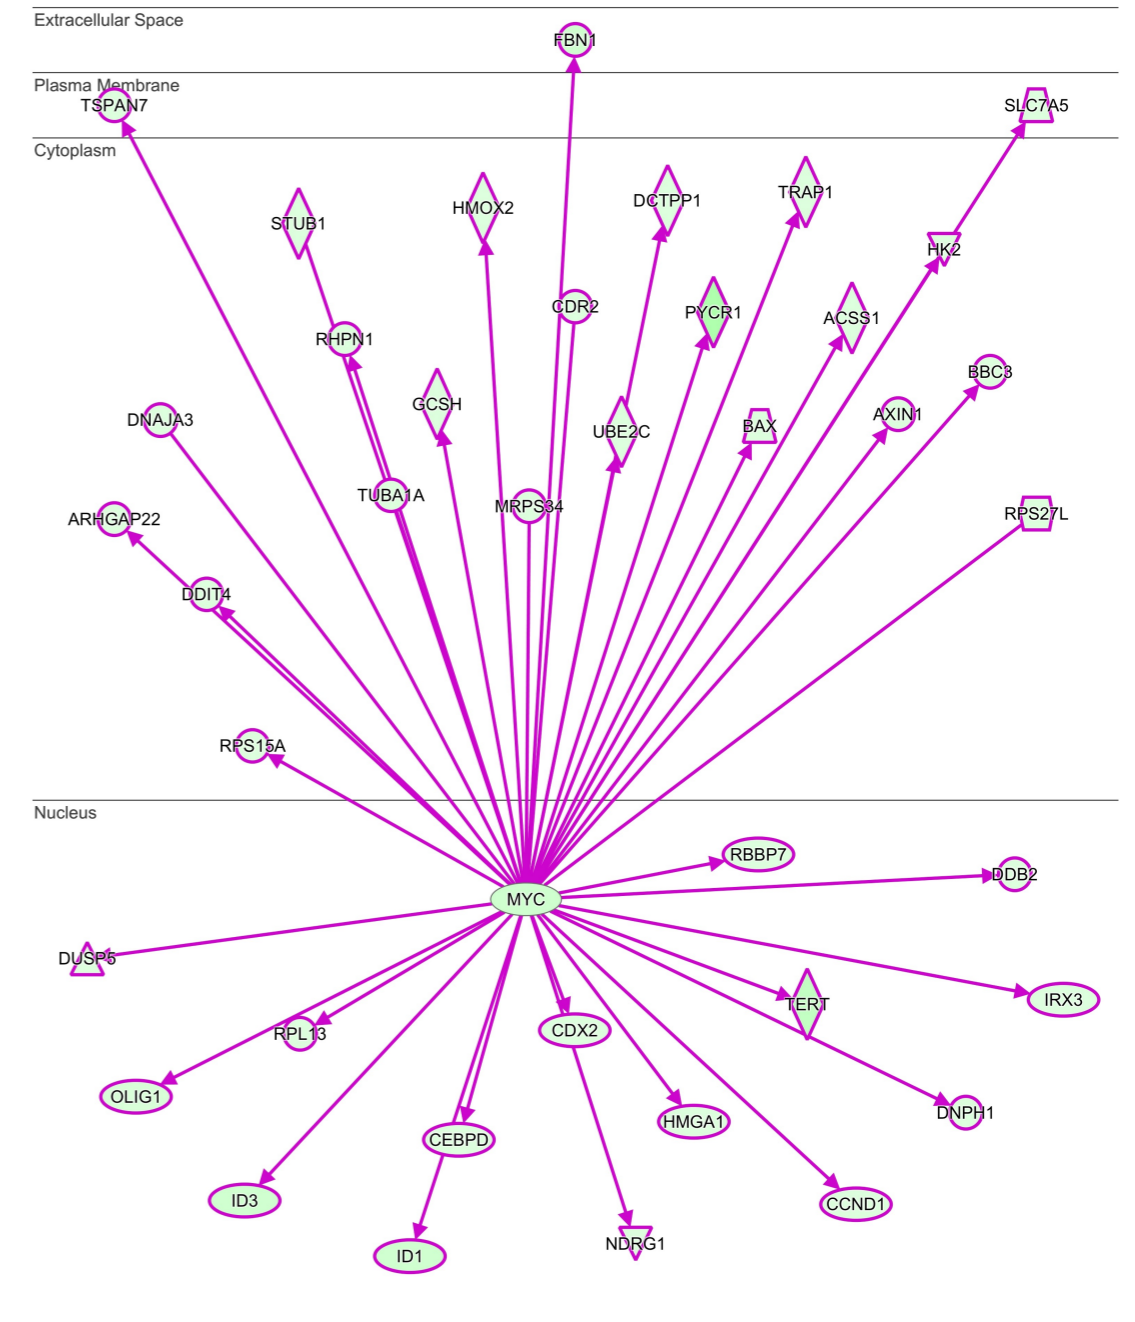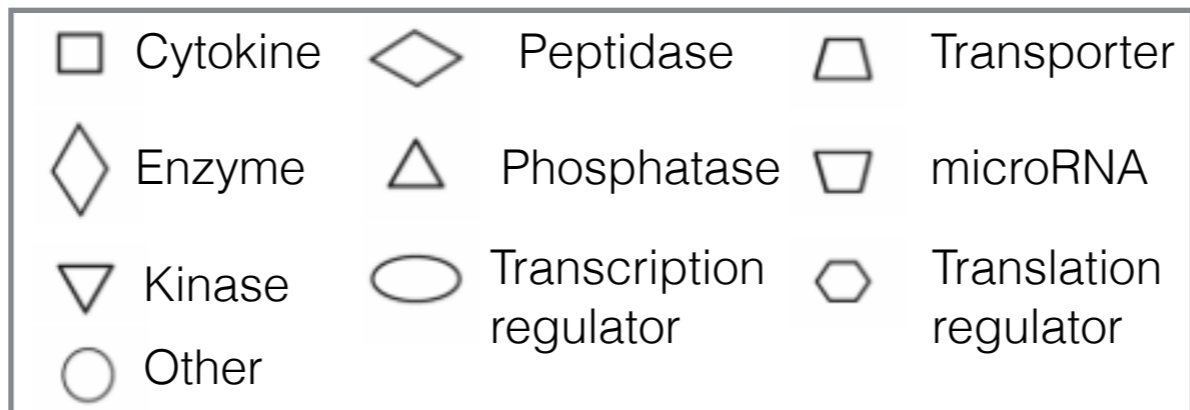

Supplement: supp_gkv1530_nar-03272-v-2015-File018.pdf [file supp_gkv1530_nar-03272-v-2015-File018.pdf]
